# Supplementary material
Source: MDPI journal article supplement (https://www.mdpi.com/2073-445X/7/1/23)
Supplement: s1 [file s1]

## Sheet: Read me
READ ME
The data shown here was digitally collected in August 2017 using the SurveyCTO package.
The data was used to develop Section 5 of the article: "Compensation for Expropriated Community Farmland in Nigeria: An in-depth analysis of the laws and practices related to land expropriation for the Lekki Free Trade Zone in Lagos", published on Land Journal, by Tagliarino et al.
The full questionnaire form and the results are licensed under the terms of CC BY 4.0. For more information about this license, please visit:
https://creativecommons.org/licenses/by/4.0/
For questions about the data and the survey questionnaire form please write to:
m.demaria@pgr.reading.ac.uk

## Sheet: Survey_questionnaire
type	name	label	hint	default	appearance	constraint	constraint message	relevance	disabled	required	required message	read only	calculation	repeat_count	media:image	media:audio	media:video	note	response_note	publishable	minimum_seconds
start	starttime
end	endtime
deviceid	deviceid
subscriberid	subscriberid
simserial	simid
caseid	caseid
phonenumber	devicephonenum
calculate	duration												duration()
note	intronote	Before beginning the interview, it is necessary to introduce the respondant to the survey and obtain his VERBAL consent to participate. Make it clear to them that their participation in the survey is voluntary and that all information will be collected ensuring confidentiality and anonimity. Once agreed, you can swipe forward to continue.
select_one yesno	A00	Have you received the respondent's verbal informed consent?								yes									O
begin group	respondant_identification_A	Identification			field-list
integer	A01	Household Identification Number	Please insert a progressive number for each of the respondants (1, 2, 3,…).			.>=0 and .<=200	Please enter a number between 0 and 200.			yes
select_one enumerator	A02	Enumerator's name								yes
end group
begin group	respondant_background_B	Respondent Background			field-list
integer	B01_numfamily	How many family members live -- meaning usually sleep -- in the household, including you?	Members of a household are adults or children that live together and usually sleep in the same house, including servants, lodgers, and agricultural labourers. Household members include anyone who has lived and usually slept your house for at least 6 of the last 12 months.			.>=0 and .<=100	Please enter a number between 0 and 100.			yes
integer	B02_numkids	How many family members are 10 years or younger?	Please include kids aged 10			.>=0 and .<=100	Please enter a number between 0 and 100.			yes
integer	B03_numelder	How many family members are 50 years or older?	Please include persons aged 60			.>=0 and .<=100	Please enter a number between 0 and 100.			yes
integer	B04_nummale	How many family members are male?	Please include both kids=<10 yrs old and elderly people=>50 years			.>=0 and .<=100	Please enter a number between 0 and 100.			yes
integer	B05_age	What is your age?				.>=0 and.<=120	Persons cannot be more than 120 years old.			yes
select_one gender	B06_gender	What is your gender?								yes
select_one literacy	B07_literacy	Can you read and write?								yes
select_one education	B08_education	What is the highest grade of education you completed								yes
select_one employment_status	B09_employmstatus	What was your employment status in the past 7 days?								yes
end group
begin group	community	Community			field-list
select_one community	B00	To which of the following communities do you belong?								yes
end group
begin group	other_community	Other Community			field-list			${B00}=11
text	B00_1_othercomm	Can you please specify the community you belong to?	You selected "Other" in the previous screen -- please type in the name of the community
end group
begin group	primary_job	Primary Job			field-list
select_one yesno	labels_A	Wich of the following options better describes your primary occupation?	Multiple selection is allowed		label
select_one yesno	B10_0_job	None / unemployed / cannot work			list-nolabel					yes
select_one yesno	B10_1_job	Farmer			list-nolabel					yes
select_one yesno	B10_2_job	Fisherman			list-nolabel					yes
select_one yesno	B10_3_job	Trader			list-nolabel					yes
select_one yesno	B10_4_job	Artisan			list-nolabel					yes
select_one yesno	B10_5_job	Other (please specify)	Select YES if applicable -- you will be allowed to type in the job specification in the next page.		list-nolabel					yes
end group
begin group	other_job	Other Job			field-list			${B10_5_job}=1
text	B10_6_otherjob	Can you please specify your primary occupation?	You selected "Other" in the previous screen -- please type in the the primay job
end group
note	Land_livestock_before_exprop	Now we will ask you about livestock and farming before the expropriation.
select_one yesno	C01_farming	Did you farm any land before the expropriation?								yes
decimal	C02_farmland	How many hectares of agricultural land did the members of the household farm before the expropriation - in an average season?	Decimal digits (i.e. 0.5) are allowed. Note that 1 hectare of land corresponds to 10000 sq meters, that is a square the side of which is equal to 100 metres. One hectare is also equivalent to 2471 acres .					${C01_farming}=1		yes
begin group	farming_purpose_before	Farming Purpose Before Expropriation			field-list			${C01_farming}=1
select_one yesno	labels_B	What was the main purpouse of farming land for your household before the expropriation?	Multiple selection is allowed		label
select_one yesno	C03_1_whyfarm	Household consumption			list-nolabel					yes
select_one yesno	C03_2_whyfarm	Income generation			list-nolabel					yes
select_one yesno	C03_3_whyfarm	Other (please specify)	Select YES if applicable -- you will be automatically allowed to specify the "other" farming purpouse in the next page.		list-nolabel					yes
end group
begin group	other_farming_purpose_before	Other Farming Purpose Before Expropriation			field-list			${C01_farming}=1 and ${C03_3_whyfarm}=1
text	C03_4_Otherwhyfarm	Can you please specify what was the main purpouse of farming before the expropriation?	You selected "Other" in the previous screen -- please type in the other main purpouse of farming
end group
begin group	crops_before	Crops Before Expropriation			field-list			${C01_farming}=1
select_one yesno	labels_C	Which of the following crops did you grow before expropriation -- in an average season?	Multiple selection is allowed		label
select_one yesno	C04_1_crop	Maize			list-nolabel					yes
select_one yesno	C04_2_crop	Ground Nut			list-nolabel					yes
select_one yesno	C04_3_crop	Cassava			list-nolabel					yes
select_one yesno	C04_4_crop	Perennial			list-nolabel					yes
select_one yesno	C04_5_crop	Other (please specify)	Select YES if applicable -- you will be allowed to type in the job specification in the next page.		list-nolabel					yes
end group
begin group	other_crop_before	Other Crop Before Expropriation			field-list			${C01_farming}=1 and ${C04_5_crop}=1
text	C04_4_othercrop	Can you please specify what was the other crop you were farming before the expropriation?	You selected "Other" in the previous screen -- please type-in the other crop
end group
text	C04_1_cropkg	What quantity -- in kg -- of maize were you harvesting before expropriation -- in an average season?			numbers_decimal			${C01_farming}=1 and ${C04_1_crop}=1		yes
text	C04_2_cropkg	What quantity -- in kg -- of ground nut were you harvesting before expropriation -- in an average season?			numbers_decimal			${C01_farming}=1 and ${C04_2_crop}=1		yes
text	C04_3_cropkg	What quantity -- in kg -- of cassava were you harvesting before expropriation -- in an average season?			numbers_decimal			${C01_farming}=1 and ${C04_3_crop}=1		yes
text	C04_4_cropkg	What quantity -- in kg -- of products from perennial were you harvesting before expropriation -- in an average season?			numbers_decimal			${C01_farming}=1 and ${C04_4_crop}=1		yes
text	C04_5_cropkg	What quantity -- in kg -- of other crops were you harvesting before expropriation -- in an average season?	Other crops mentioned were: ${C04_4_othercrop}		numbers_decimal			${C01_farming}=1 and ${C04_5_crop}=1		yes
select_one yesno	C05_livestock	Did you have any livestock before the expropriation?								yes
begin group	livestock_purpose_before	Livestock Purpose Before Expropriation			field-list			${C05_livestock}=1
select_one yesno	labels_D	What was the main purpouse of having livestock for your household before the expropriation?	Multiple selection is allowed		label
select_one yesno	C05_1_whylivestk	Household consumption			list-nolabel					yes
select_one yesno	C05_2_whylivestk	Income generation			list-nolabel					yes
select_one yesno	C05_3_whylivestk	Other (please specify)	Select YES if applicable -- you will be automatically allowed to specify the "other" farming purpouse in the next page.		list-nolabel					yes
end group
begin group	other_livestock_purpose_before	Other livestock Purpose Before Expropriation			field-list			${C05_livestock}=1 and ${C05_3_whylivestk}=1
text	C05_4_otherwhylivestk	Can you please specify what was the other purpouse of of having livestock before the expropriation?	You selected "Other" in the previous screen -- please type in the other main purpouse of having livestock
end group
begin group	livestock_before	Livestock Before Expropriation			field-list			${C05_livestock}=1
select_one yesno	labels_E	Which of the following livestock did you have before expropriation?	Multiple selection is allowed		label
select_one yesno	C05_1_livestk	Cows / Cattle / Bulls			list-nolabel					yes
select_one yesno	C05_2_livestk	Goats			list-nolabel					yes
select_one yesno	C05_3_livestk	Sheeps			list-nolabel					yes
select_one yesno	C05_4_livestk	Pigs			list-nolabel					yes
select_one yesno	C05_5_livestk	Horses / Donkeys			list-nolabel					yes
select_one yesno	C05_6_livestk	Chickens / Hens / Poultry			list-nolabel					yes
select_one yesno	C05_7_livestk	Other (please specify)	Select YES if applicable -- you will be allowed to type in the other atyoe of livestock specification in the next page.		list-nolabel					yes
end group
begin group	other_livestock_before	Other Livestock Before Expropriation			field-list			${C05_livestock}=1 and ${C05_7_livestk}=1
text	C05_8_otherlivestk	Can you please specify what other livestock you had before the expropriation?	You selected "Other" in the previous screen -- please type in the other main purpouse of having livestock
end group
text	C05_1_livestkhead	How many Cows / Cattle / Bulls -- heads -- did you have before expropriation -- in an average season?			numbers			${C05_livestock}=1 and ${C05_1_livestk}=1		yes
text	C05_2_livestkhead	How many Goats -- heads -- did you have before expropriation -- in an average season?			numbers			${C05_livestock}=1 and ${C05_2_livestk}=1		yes
text	C05_3_livestkhead	How many Sheeps -- heads -- did you have before expropriation -- in an average season?			numbers			${C05_livestock}=1 and ${C05_3_livestk}=1		yes
text	C05_4_livestkhead	How many Pigs -- heads -- did you have before expropriation -- in an average season?			numbers			${C05_livestock}=1 and ${C05_4_livestk}=1		yes
text	C05_5_livestkhead	How many Horses /Donkeys -- heads -- did you have before expropriation -- in an average season?			numbers			${C05_livestock}=1 and ${C05_5_livestk}=1		yes
text	C05_6_livestkhead	How many Chickens / Hens / Poultry -- heads -- did you have before expropriation -- in an average season?			numbers			${C05_livestock}=1 and ${C05_6_livestk}=1		yes
text	C05_7_livestkhead	How many other animals -- heads -- did you have before expropriation -- in an average season?	Other animals mentioned were: ${C05_8_otherlivestk}		numbers			${C05_livestock}=1 and ${C05_7_livestk}=1		yes
note	Land_livestock_after_exprop	Now we will ask you about livestock and farming after the expropriation.
select_one yesno	D01_farming	Do you farm any land after the expropriation?								yes
decimal	D02_farmland	How many hectares of agricultural land do the members of the household farm after the expropriation - in an average season?	Decimal digits (i.e. 0.5) are allowed. Note that 1 hectare of land corresponds to 10000 sq meters, that is a square the side of which is equal to 100 metres. One hectare is also equivalent to 2471 acres .					${D01_farming}=1		yes
begin group	farming_purpose_after	Farming Purpose After Expropriation			field-list			${D01_farming}=1
select_one yesno	labels_F	What is the main purpouse of farming land for your household after the expropriation?	Multiple selection is allowed		label
select_one yesno	D03_1_whyfarm	Household consumption			list-nolabel					yes
select_one yesno	D03_2_whyfarm	Income generation			list-nolabel					yes
select_one yesno	D03_3_whyfarm	Other (please specify)	Select YES if applicable -- you will be automatically allowed to specify the "other" farming purpouse in the next page.		list-nolabel					yes
end group
text	D03_4_Otherwhyfarm	Can you please specify what is the other main purpouse of farming after the expropriation?	You selected "Other" in the previous screen -- please type in the other main purpouse of farming					${D01_farming}=1 and ${D03_3_whyfarm}=1
begin group	crops_after	Crops After Expropriation			field-list			${D01_farming}=1
select_one yesno	labels_G	Which of the following crops do you grow after expropriation -- in an average season?	Multiple selection is allowed		label
select_one yesno	D04_1_crop	Maize			list-nolabel					yes
select_one yesno	D04_2_crop	Ground Nut			list-nolabel					yes
select_one yesno	D04_3_crop	Cassava			list-nolabel					yes
select_one yesno	D04_4_crop	Perennial			list-nolabel					yes
select_one yesno	D04_5_crop	Other (please specify)	Select YES if applicable -- you will be allowed to type in the other crop in the next page.		list-nolabel					yes
end group
begin group	other_crop_after	Other Crop After Expropriation			field-list			${D01_farming}=1 and ${D04_5_crop}=1
text	D04_6_othercrop	Can you please specify what is the name of the other crop you are farming after the expropriation?	You selected "Other" in the previous screen -- please type-in the other crop
end group
text	D04_1_cropkg	What quantity -- in kg -- of maize were you harvesting after expropriation -- in an average season?			numbers_decimal			${D01_farming}=1 and ${D04_1_crop}=1		yes
text	D04_2_cropkg	What quantity -- in kg -- of ground nut were you harvesting after expropriation -- in an average season?			numbers_decimal			${D01_farming}=1 and ${D04_2_crop}=1		yes
text	D04_3_cropkg	What quantity -- in kg -- of cassava were you harvesting after expropriation -- in an average season?			numbers_decimal			${D01_farming}=1 and ${D04_3_crop}=1		yes
text	D04_4_cropkg	What quantity -- in kg -- of products from perennial were you harvesting after expropriation -- in an average season?			numbers_decimal			${D01_farming}=1 and ${D04_4_crop}=1		yes
text	D04_5_cropkg	What quantity -- in kg -- of other crops were you harvesting after expropriation -- in an average season?	Other crops mentioned were: ${D04_6_othercrop}		numbers_decimal			${D01_farming}=1 and ${D04_5_crop}=1		yes
select_one yesno	D05_livestock	Did you have any livestock after the expropriation?								yes
begin group	livestock_purpose_after	Livestock Purpose After Expropriation			field-list			${D05_livestock}=1
select_one yesno	labels_H	What was the main purpouse of having livestock for your household after the expropriation?	Multiple selection is allowed		label
select_one yesno	D05_1_whylivestk	Household consumption			list-nolabel					yes
select_one yesno	D05_2_whylivestk	Income generation			list-nolabel					yes
select_one yesno	D05_3_whylivestk	Other (please specify)	Select YES if applicable -- you will be automatically allowed to specify the "other" farming purpouse in the next page.		list-nolabel					yes
end group
begin group	other_livestock_purpose_after	Other livestock Purpose After Expropriation			field-list			${D05_livestock}=1 and ${D05_3_whylivestk}=1
text	D05_4_otherwhylivestk	Can you please specify what was the other purpouse of of having livestock after the expropriation?	You selected "Other" in the previous screen -- please type in the other main purpouse of having livestock
end group
begin group	livestock_after	Livestock After Expropriation			field-list			${D05_livestock}=1
select_one yesno	labels_I	Which of the following livestock do you have after expropriation?	Multiple selection is allowed		label
select_one yesno	D05_1_livestk	Cows / Cattle / Bulls			list-nolabel					yes
select_one yesno	D05_2_livestk	Goats			list-nolabel					yes
select_one yesno	D05_3_livestk	Sheeps			list-nolabel					yes
select_one yesno	D05_4_livestk	Pigs			list-nolabel					yes
select_one yesno	D05_5_livestk	Horses / Donkeys			list-nolabel					yes
select_one yesno	D05_6_livestk	Chickens / Hens / Poultry			list-nolabel					yes
select_one yesno	D05_7_livestk	Other (please specify)	Select YES if applicable -- you will be allowed to type in the other type of livestock in the next page.		list-nolabel					yes
end group
begin group	other_livestock_preexprop_after	Other Livestock After Expropriation			field-list			${D05_livestock}=1 and ${D05_7_livestk}=1
text	D05_8_otherwhylivestk	Can you please specify what was the other purpouse of of having livestock after the expropriation?	You selected "Other" in the previous screen -- please type in the other main purpouse of having livestock
end group
text	D05_1_livestkhead	How many Cows / Cattle / Bulls -- heads -- did you have after expropriation -- in an average season?			numbers			${D05_livestock}=1 and ${D05_1_livestk}=1		yes
text	D05_2_livestkhead	How many Goats -- heads -- did you have after expropriation -- in an average season?			numbers			${D05_livestock}=1 and ${D05_2_livestk}=1		yes
text	D05_3_livestkhead	How many Sheeps -- heads -- did you have after expropriation -- in an average season?			numbers			${D05_livestock}=1 and ${D05_3_livestk}=1		yes
text	D05_4_livestkhead	How many Pigs -- heads -- did you have after expropriation -- in an average season?			numbers			${D05_livestock}=1 and ${D05_4_livestk}=1		yes
text	D05_5_livestkhead	How many Horses /Donkeys -- heads -- did you have after expropriation -- in an average season?			numbers			${D05_livestock}=1 and ${D05_5_livestk}=1		yes
text	D05_6_livestkhead	How many Chickens / Hens / Poultry -- heads -- did you have after expropriation -- in an average season?			numbers			${D05_livestock}=1 and ${D05_6_livestk}=1		yes
text	D05_7_livestkhead	How many other animals -- heads -- did you have after expropriation -- in an average season?	Other animals mentioned were: ${D05_8_otherwhylivestk}		numbers			${D05_livestock}=1 and ${D05_7_livestk}=1		yes
select_one yesnodnk	E01_natenv	Is your access to the surrounding natural environment more limited since expropriation?								yes
text	E01_1_hownatenv	In what way is your access to the surrounding natural environment more limited since expropriation (E.g., loss of access medicinal plants, firewood, game)?						${E01_natenv}=1		yes
select_one yesnodnk	F00	Were you informed about the LFTZ project before the project began?								yes
select_one yesnodnk	F01	Before the project began, were you consulted about the implications of the project on your community?	E.g., amount of land acquired, environmental risks, social risks, expropriation, etc…							yes
select_one yesnodnk	F01_1	Do you remember when were you informed the first time about the implications of the project on your community?						${F01}=1		yes
date	F02	When were you informed the first time about the implications of the project on your community?			month-year			${F01}=1 and ${F01_1}=1		yes
select_one yesnodnk	F00_1	Were you informed about the expropriation?								yes
select_one yesnodnk	F00_1_1	Do you remember when were you informed about the expropriation the first time?						${F00_1}=1		yes
date	F00_2	When were you informed about the expropriation the first time?			month-year			${F00_1}=1 and ${F00_1_1}=1		yes
select_one yesnodnk	F03	Were you given an opportunity to give input in the expropriation plans?								yes
select_one yesnodnk	F04	Were you made aware of any environmental/social impact assessment conducted for the project?								yes
select_one yesnodnk	F05	Were you promised any compensation for the expropriation?								yes
select_one yesnodnk	F06	Were you given the opportunity to negotiate compensation?						${F05}=1		yes
select_one yesnodnk	F06_1	Do you remember when were you given the opportunity to negotiate compensation?						${F06}=1		yes
date	F07	When were you given the opportunity to negotiate compensation?			month-year			${F05}=1 and ${F06}=1 and ${F06_1}=1		yes
select_one yesnodnk	F08_0	Were you told how compensation was calculated?						${F05}=1		yes
begin group	compensation_factors	Compensation Factors			field-list			${F05}=1
select_one yesnodnk	labels_L	Did the promised compensation account for any of the following factors?	Multiple selection is allowed		label
select_one yesnodnk	F08_1	Market value of land			list-nolabel					yes
select_one yesnodnk	F08_2	Land use			list-nolabel					yes
select_one yesnodnk	F08_3	Economic activities			list-nolabel					yes
select_one yesnodnk	F08_4	Social, spiritual, cultural values…			list-nolabel					yes
select_one yesnodnk	F08_5	Crops grown on land			list-nolabel					yes
select_one yesnodnk	F08_6	Other (please specify)	Select YES if applicable -- you will be allowed to type in the other compensation factor in the next page.		list-nolabel					yes
end group
begin group	other_compensation_factor	Other Compensation Factors			field-list			${F05}=1 and ${F08_6}=1
text	F08_7_othercompfact	Can you please specify what other factors where considered when calculating compensation?	You selected "Other" in the previous screen -- please type in and specify what other factors were considered
end group
begin group	compensation_type	Compensation Type			field-list			${F05}=1
select_one yesnodnk	labels_M	Which of the following type of compensation were you promised?	Multiple selection is allowed		label
select_one yesnodnk	F09_1	Money			list-nolabel					yes
select_one yesnodnk	F09_2	Alternative Land			list-nolabel					yes
select_one yesnodnk	F09_3	Jobs			list-nolabel					yes
select_one yesnodnk	F09_4	Equity share in the project			list-nolabel					yes
select_one yesnodnk	F09_5	Other (please specify)	Select YES if applicable -- you will be allowed to type in the other type of compensation in the next page.		list-nolabel					yes
end group
begin group	other_compensation_type	Other Compensation Type			field-list			${F05}=1 and ${F09_5}=1
text	F09_6_othercompfact	Can you please specify what type of compensation were you promised?	You selected "Other" in the previous screen -- please type in the other type of compensation
end group
text	F10_1	How much money -- in local currency -- were you promised?	If don't know / don't remember / prefer not to say --> type in 99		numbers_decimal			${F05}=1 and ${F09_1}=1
text	F10_2	How much alterantive land -- in hecatares -- were you promised?	If don't know / don't remember / prefer not to say --> type in 99		numbers_decimal			${F05}=1 and ${F09_2}=1
text	F10_3	How many jobs were you promised?	If don't know / don't remember / prefer not to say --> type in 99		numbers			${F05}=1 and ${F09_3}=1
text	F10_4	What is the monetary value -- in local currency -- of the equity share you were promised?	If don't know / don't remember / prefer not to say --> type in 99		numbers_decimal			${F05}=1 and ${F09_4}=1
text	F10_5	What is the monetary value -- in local currency -- of all other type of compensation that you were promised?	If don't know / don't remember / prefer not to say --> type in 99 Other type of compensation mentioned were: ${F09_6_othercompfact}		numbers_decimal			${F05}=1 and ${F09_5}=1
begin group	ideal_compensation_type	Ideal Compensation Type			field-list			${F05}=1
select_one yesnodnk	labels_N	Assuming that you can get the amount of compensation that covers all losses, which of the followings would be your ideal type of compensation?	Multiple selection is allowed		label
select_one yesnodnk	F11_1	Money			list-nolabel					yes
select_one yesnodnk	F11_2	Alternative Land			list-nolabel					yes
select_one yesnodnk	F11_3	Jobs			list-nolabel					yes
select_one yesnodnk	F11_4	Equity share in the project			list-nolabel					yes
select_one yesnodnk	F11_5	Other (please specify)	Select YES if applicable -- you will be allowed to type in the other type of compensation in the next page.		list-nolabel					yes
end group
begin group	other_ideal_compensation_type	Other Ideal Compensation Type			field-list			${F05}=1 and ${F11_5}=1
text	F11_6_othercompfact	Can you please specify what other type of compensation would be ideal for you?	You selected "Other" in the previous screen -- please type in the other type of ideal compensation
end group
text	F12_1	How much money -- in local currency -- would you receive as an ideal compensation that covers all losses?	If don't know / don't remember / prefer not to say --> type in 99		numbers_decimal			${F05}=1 and ${F11_1}=1
text	F12_2	How much alterantive land -- in hecatares -- would you receive as an ideal compensation that covers all losses?	If don't know / don't remember / prefer not to say --> type in 99		numbers_decimal			${F05}=1 and ${F11_2}=1
text	F12_3	How many new jobs would be needed as an ideal compensation that covers all losses?	If don't know / don't remember / prefer not to say --> type in 99		numbers			${F05}=1 and ${F11_3}=1
text	F12_4	What is the monetary value -- in local currency -- of the equity share in the project that would be needed as an ideal compensation that covers all losses?	If don't know / don't remember / prefer not to say --> type in 99		numbers_decimal			${F05}=1 and ${F11_4}=1
text	F12_5	What would be the overall monetary value -- in local currency -- of all other ideal types of compensation you mentioned -- as an ideal compensation that covers all losses?	If don't know / don't remember / prefer not to say --> type in 99 Other type of compensation mentioned were: ${F11_6_othercompfact}		numbers_decimal			${F05}=1 and ${F11_5}=1
select_one cover_loss	F13	Did the amount of promised compensation cover your losses?						${F05}=1		yes
select_one yesno	F14	Did you actually receive any compensation?								yes
select_one cover_loss	F14_0	Did the actual compensation cover your losses?						${F14}=1		yes
text	F14_1	Can you please specify what is the overall monetary value -- in local currency -- of the compensation you received	If don't know / don't remember / prefer not to say --> type in 99		numbers_decimal			${F14}=1
select_one yesnodnk	F_14_2	Is there any unpaid compensation remaining?						${F14}=1		yes
select_one yesnodnk	F_14_2_1	Were you told when you would be paid the remaining compensation?						${F14}=1 and ${F_14_2}=1		yes
date	F_14_2_2	When were you told you would be paid the remaining compensation?			month-year			${F14}=1 and ${F_14_2}=1 and ${F_14_2_1}=1
select_one yesno	F15_1	Did you receive any compensation for losses of livestock due to the expropriation?						${F14}=1		yes
select_one yesno	F15_2	Did you receive any compensation for losses of crops on your farmland due to the expropriation?						${F14}=1		yes
begin group	crop_compensated	Crop Compensated			field-list			${F14}=1 and ${F15_2}=1
select_one yesno	labels_O	Which of the following crops were compensated?	Multiple selection is allowed		label
select_one yesno	F16_1_crop	Maize			list-nolabel					yes
select_one yesno	F16_2_crop	Ground Nut			list-nolabel					yes
select_one yesno	F16_3_crop	Cassava			list-nolabel					yes
select_one yesno	F16_4_crop	Perennial			list-nolabel					yes
select_one yesno	F16_5_crop	Other (please specify)	Select YES if applicable -- you will be allowed to type in the other crop in the next page.		list-nolabel					yes
end group
begin group	other_crop_compensated	Other Crop After Expropriation			field-list			${F14}=1 and ${F15_2}=1 and ${F16_5_crop}=1
text	F16_6_othercrop	Can you please specify what is the name of the other crop you were compensated for?	You selected "Other" in the previous screen -- please type-in the other crop
end group
text	F_17	How much were you compensated for maize -- in local currency?	PLEASE SPECIFY MEASUREMENT UNIT (E.G., monetary_value/Kg OR monetary_value/Hectare) If don't know / don't remember / prefer not to say --> type in 99					${F14}=1 and ${F15_2}=1 and ${F16_1_crop}=1
text	F_18	How much were you compensated for grond nut -- in local currency?	PLEASE SPECIFY MEASUREMENT UNIT (E.G., monetary_value/Kg OR monetary_value/Hectare) If don't know / don't remember / prefer not to say --> type in 99					${F14}=1 and ${F15_2}=1 and ${F16_2_crop}=1
text	F_19	How much were you compensated for cassava -- in local currency?	PLEASE SPECIFY MEASUREMENT UNIT (E.G., monetary_value/Kg OR monetary_value/Hectare) If don't know / don't remember / prefer not to say --> type in 99					${F14}=1 and ${F15_2}=1 and ${F16_3_crop}=1
text	F_20	How much were you compensated for perennial crops -- in local currency?	PLEASE SPECIFY MEASUREMENT UNIT (E.G., monetary_value/Kg OR monetary_value/Hectare) If don't know / don't remember / prefer not to say --> type in 99					${F14}=1 and ${F15_2}=1 and ${F16_4_crop}=1
text	F_21	How much were you compensated for other crops -- in local currency?	PLEASE SPECIFY MEASUREMENT UNIT (E.G., monetary_value/Kg OR monetary_value/Hectare) If don't know / don't remember / prefer not to say --> type in 99					${F14}=1 and ${F15_2}=1 and ${F16_5_crop}=1
text	F_22	How much do you think you should have received as compensation?	please insert monetary value in local currency. If don't know / don't remember / prefer not to say --> type in 99		numbers_decimal					yes
note	conclusion	Thank you for your time. That concludes the survey.

## Sheet: Choice_sets
list_name	value	label	image
yesno	1	Yes
yesno	0	No
enumerator	1	Nick
enumerator	2	Yakubu
enumerator	3	Tobi
enumerator	4	Magbagbeola
enumerator	5	Other
gender	1	Male
gender	2	Female
literacy	1	Cannot read and write
literacy	2	Can sign (write) only
literacy	3	Can read only
literacy	4	Can read and write
education	0	None/never attended school
education	1	Pre-primary/kindergarten
education	2	Primary
education	3	Secondary
education	4	Higher
education	99	don't know
employment_status	1	Worked for pay (salary, wage, self-employed)
employment_status	2	Worked without pay (apprentice, family business, etc…)
employment_status	3	Did not work but have a job (sick, vacation, etc..)
employment_status	4	Did not work but looked for a job
employment_status	5	Did not work and didn't looked for a job
yesnodnk	1	yes
yesnodnk	0	no
yesnodnk	99	Don't know
cover_loss	1	Yes, it covers even more than what I have lost
cover_loss	2	Yes, it covers exactly what I have lost
cover_loss	3	Only partially covers what I have lost
cover_loss	4	No, it does not cover at all what I have lost
cover_loss	99	Don’t know / Prefer not to say
community	1	Idasho
community	2	Idotun
community	3	Ilege
community	4	Imobido
community	5	Itoke
community	6	Okunraye
community	7	Ilekuru
community	8	Tiye
community	9	Imagbon-Segun
community	10	Oke-Segun
community	11	Other (Please specify)
community	99	Don’t know / Prefer not to say

## Sheet: Data_full_results_LFTZ
deviceid	duration	starttime	endtime	submissiondate	formdef_version	key	id	a00	a01	a02	b01_numfamily	b02_numkids	b03_numelder	b04_nummale	b05_age	age_cat	b06_gender	b07_literacy	b08_education	b09_employmstatus	b00	b00_1_othercomm	labels_a	b10_0_job	b10_1_job	b10_2_job	b10_3_job	b10_4_job	b10_5_job	b10_6_otherjob	c01_farming	c02_farmland	labels_b	c03_1_whyfarm	c03_2_whyfarm	c03_3_whyfarm	c03_4_otherwhyfarm	labels_c	c04_1_crop	c04_2_crop	c04_3_crop	c04_4_crop	c04_5_crop	c04_4_othercrop	c04_1_cropkg	c04_2_cropkg	c04_3_cropkg	c04_4_cropkg	c04_5_cropkg
861598034197054	1998	2017-08-11 10:26:22	2017-08-11 10:59:40	2017-08-11 13:00:11	1708110451	uuid:0057b2c2-bba4-4de1-91b6-10d1d0e339d9	1	Yes	1	Yakubu	5	2	6	0	67	65+	Male	Can read and write	Primary	Worked without pay (apprentice, family business, etc…)	Imagbon-Segun			No	Yes	Yes	No	No	No		Yes	20		Yes	Yes	No			Yes	Yes	Yes	No	Yes	Plantain mango vegetables	1000	2000	1500		1300
861598034197054	812	2017-08-11 11:40:56	2017-08-11 11:54:28	2017-08-11 13:00:13	1708110451	uuid:03acc4c7-4727-4b15-b8be-13431f93b102	2	Yes	5	Yakubu	11	5	1	5	50	35-44	Male	Can read and write	Primary	Worked for pay (salary, wage, self-employed)	Imagbon-Segun			No	Yes	No	No	No	Yes	Civil servant	Yes	7		Yes	Yes	No			Yes	Yes	Yes	No	Yes	Egusi Mango banana sugarcane	0	0	0		0
861598034197054	905	2017-08-11 14:17:47	2017-08-11 14:32:52	2017-08-11 14:41:43	1708110451	uuid:2b0c732b-2c11-49e5-bad5-9704d77203f0	3	Yes	7	Yakubu	13	6	2	4	45	35-44	Male	Can read and write	Secondary	Did not work but looked for a job	Imagbon-Segun			No	Yes	No	No	Yes	No		Yes	10		Yes	Yes	No			Yes	Yes	Yes	No	Yes	Yam cucumber vegetables	0	0	0		0
861598034197054	888	2017-08-11 11:13:18	2017-08-11 11:28:06	2017-08-11 13:00:12	1708110451	uuid:4d6d4f2c-8e69-44d0-9e0f-0c85ed2c846b	4	Yes	3	Yakubu	13	9	0	7	41	25-34	Male	Can read and write	Secondary	Worked without pay (apprentice, family business, etc…)	Imagbon-Segun			No	Yes	Yes	No	No	No		Yes	1.5		Yes	Yes	No			No	No	Yes	Yes	Yes	Mango coconut banana			0	0	0
861598034197054	1080	2017-08-11 14:42:21	2017-08-11 15:00:21	2017-08-11 16:42:46	1708110451	uuid:7ed28d86-417b-484e-956b-047e86370440	5	Yes	8	Yakubu	24	10	2	4	58	45-54	Male	Cannot read and write	Secondary	Worked without pay (apprentice, family business, etc…)	Imagbon-Segun			No	Yes	No	No	No	Yes	Contractor traditional head	Yes	1		Yes	Yes	No			Yes	Yes	Yes	No	Yes	Sugarcane vegetables	0	0	0		0
861598034197054	646	2017-08-11 12:04:39	2017-08-11 12:15:26	2017-08-11 13:00:13	1708110451	uuid:bc8e8b8d-5bef-4b77-9ff9-9d02f9446e8f	6	Yes	6	Yakubu	12	5	0	6	25	25-34	Male	Can read and write	Secondary	Worked without pay (apprentice, family business, etc…)	Imagbon-Segun			No	Yes	Yes	No	No	Yes	Mason	Yes	5		Yes	Yes	No			No	No	Yes	No	Yes	Okro mango coconut water melon popcorn tomatoes			0		0
861598034197054	946	2017-08-11 15:00:27	2017-08-11 15:16:13	2017-08-11 16:42:47	1708110451	uuid:d5091ca5-975d-4493-a672-284dcd89c662	7	Yes	9	Yakubu	30	15	3	18	70	65+	Male	Can read and write	Secondary	Worked without pay (apprentice, family business, etc…)	Imagbon-Segun			No	Yes	No	No	No	No		No	0
861598034197054	735	2017-08-11 11:00:27	2017-08-11 11:12:41	2017-08-11 13:00:12	1708110451	uuid:da699553-a658-4e63-ad01-5dc3a7d1e3d9	8	Yes	2	Yakubu	10	7	3	4	86	65+	Male	Can read and write	Pre-primary/kindergarten	Worked without pay (apprentice, family business, etc…)	Imagbon-Segun			No	No	No	No	No	Yes	Imam	Yes	10		Yes	Yes	No			No	No	Yes	No	No				5000
861598034197054	723	2017-08-11 11:28:33	2017-08-11 11:40:37	2017-08-11 13:00:13	1708110451	uuid:f2b513c8-3e70-491a-a724-07c2072c2dca	9	Yes	4	Yakubu	16	7	1	7	51	35-44	Male	Can read and write	Primary	Worked without pay (apprentice, family business, etc…)	Imagbon-Segun			No	Yes	No	No	No	No		Yes	4		Yes	Yes	No			No	No	Yes	No	Yes	Cassavas potatoes banana yam sugarcane cocoyam			0		0
861598034197054	536	2017-08-11 16:18:50	2017-08-11 16:27:46	2017-08-11 16:42:50	1708110451	uuid:28e7ac62-1d7f-4f3c-9bfd-fe84ac439cd4	10	Yes	16	Yakubu	15	5	5	5	50	35-44	Female	Cannot read and write	None/never attended school	Did not work and didn't looked for a job	Oke-Segun			No	No	No	No	No	No		Yes	20		Yes	Yes	No			Yes	Yes	Yes	No	Yes	Mango plantain sugarcane vegetables	0	0	0		0
861598034197054	663	2017-08-11 15:25:54	2017-08-11 15:36:57	2017-08-11 16:42:48	1708110451	uuid:2c5ad0ce-319a-4279-9b66-e1f6374a6f2d	11	Yes	11	Yakubu	8	6	2	4	55	45-54	Male	Can read and write	Primary	Worked without pay (apprentice, family business, etc…)	Oke-Segun			No	Yes	Yes	No	No	No		Yes	8		Yes	Yes	No			Yes	Yes	Yes	No	No		0	0	0
861598034197054	554	2017-08-11 15:55:52	2017-08-11 16:05:07	2017-08-11 16:42:49	1708110451	uuid:47154a41-49f5-41e8-807f-67ec17d2ab1d	12	Yes	15	Yakubu	15	12	7	12	64	55-64	Female	Cannot read and write	None/never attended school	Did not work but looked for a job	Oke-Segun			No	No	No	No	No	No		Yes	10		Yes	Yes	No			Yes	Yes	Yes	No	Yes	Vegetables fresh fish banana	0	0	0		0
861598034197054	567	2017-08-11 15:16:20	2017-08-11 15:25:47	2017-08-11 16:42:47	1708110451	uuid:6d81bd71-7214-4b7d-8793-f0cd5b97e354	13	Yes	10	Yakubu	20	5	5	2	75	65+	Male	Can read and write	Primary	Did not work and didn't looked for a job	Oke-Segun			No	Yes	No	No	No	No		Yes	20		Yes	Yes	No			No	Yes	Yes	No	Yes	Potatoes sugarcane banana		0	0		0
a9f85941d979a989	1809	2017-08-11 11:04:01	2017-08-11 11:34:11	2017-08-11 19:55:27	1708110451	uuid:7e38d339-4f4c-4b82-b703-32237a8dc662	14	Yes	1	Tobi	9	4	4	3	70	65+	Male	Can read only	Primary	Did not work but looked for a job	Oke-Segun			Yes	No	No	No	No	Yes	Retiree	Yes	7		No	No	No			Yes	No	Yes	Yes	Yes	Mango, Yam, Vegetables	1000		2000	500	1000
861598034197054	538	2017-08-11 16:33:01	2017-08-11 16:41:59	2017-08-11 16:42:51	1708110451	uuid:8d423f3d-b835-45f6-b8dc-21b594f02f70	15	Yes	18	Yakubu	6	4	1	1	35	25-34	Male	Can read and write	Higher	Worked without pay (apprentice, family business, etc…)	Oke-Segun			No	No	No	No	No	Yes	Operates fish pond	Yes	5		Yes	Yes	No			Yes	No	Yes	No	Yes	Vegetables	0		0		0
861598034197054	545	2017-08-11 15:37:24	2017-08-11 15:46:29	2017-08-11 16:42:48	1708110451	uuid:ada4a37b-003d-4cff-b435-da986be5d7f4	16	Yes	12	Tobi	15	10	5	6	60	45-54	Female	Cannot read and write	None/never attended school	Did not work and didn't looked for a job	Oke-Segun			No	No	No	No	No	No		Yes	8		Yes	Yes	No			Yes	Yes	Yes	No	Yes	Vegetables plantain melon seed	0	0	0		0
861598034197054	549	2017-08-11 15:46:39	2017-08-11 15:55:48	2017-08-11 16:42:49	1708110451	uuid:dc83dc37-486c-43ec-b85b-269154b3e92a	17	Yes	13	Yakubu	12	8	5	3	60	45-54	Female	Cannot read and write	None/never attended school	Did not work but have a job (sick, vacation, etc..)	Oke-Segun			No	No	No	No	No	No		No	0
861598034197054	757	2017-08-11 16:05:22	2017-08-11 16:17:59	2017-08-11 16:42:50	1708110451	uuid:f2a69ef3-1faa-4399-9cb8-60c2968e3fab	18	Yes	16	Yakubu	20	10	5	7	80	65+	Female	Cannot read and write	None/never attended school	Did not work but have a job (sick, vacation, etc..)	Oke-Segun			No	No	No	No	No	No		Yes	10		Yes	Yes	No			Yes	Yes	Yes	No	Yes	Mango vegetables	0	0	0		0
a9f85941d979a989	1439	2017-08-12 12:40:12	2017-08-12 13:04:10	2017-08-12 21:48:31	1708110451	uuid:0ac9e46d-10de-4070-b5af-726101116dda	19	Yes	23	Nick	25	6	2	22	43	25-34	Male	Can read and write	Primary	Worked without pay (apprentice, family business, etc…)	Oke-Segun			No	Yes	No	No	No	Yes	Native doctor	Yes	50		Yes	Yes	No			Yes	Yes	Yes	Yes	Yes	Mango cashew pineapple oranges guava	16000	8000	50000	10000	10000
a9f85941d979a989	1795	2017-08-11 11:34:30	2017-08-11 12:04:25	2017-08-11 19:55:27	1708110451	uuid:2d0fa5e9-b2c3-49c7-bf69-79dd24658b86	20	Yes	2	Tobi	20	8	3	6	58	45-54	Male	Cannot read and write	None/never attended school	Did not work but have a job (sick, vacation, etc..)	Okunraye			No	Yes	Yes	No	No	No		Yes	20		Yes	Yes	No			Yes	No	Yes	No	Yes	Yam, Plantation	1000		2000		1000
a9f85941d979a989	2788	2017-08-12 11:55:20	2017-08-12 21:45:34	2017-08-12 21:48:30	1708110451	uuid:630000c7-e1f0-4f9a-9e6b-76a9198c76de	21	Yes	21	Nick	20	3	1	15	58	45-54	Male	Cannot read and write	Primary	Worked without pay (apprentice, family business, etc…)	Okunraye			No	No	Yes	No	No	No		Yes	50		Yes	Yes	No			Yes	Yes	Yes	Yes	Yes	Mango pineapple cocoyam melon coconut vegetables	16000	10000	8000	400	1600
a9f85941d979a989	1123	2017-08-12 13:53:32	2017-08-12 21:47:54	2017-08-12 21:48:33	1708110451	uuid:75ca60c7-57b0-4538-8844-40315616bbe7	22	Yes	29	Nick	30	25	5	15	55	45-54	Female	Cannot read and write	None/never attended school	Did not work and didn't looked for a job	Okunraye			No	No	No	No	No	Yes	Process crops to prepare for selling (cut up and grind crops)	Yes	8		Yes	Yes	No			Yes	Yes	Yes	Yes	Yes	Mango banana pineapple apple oranges cashew	8000	3000	100000	25000	25000
a9f85941d979a989	1217	2017-08-12 14:41:42	2017-08-12 15:01:58	2017-08-12 21:48:34	1708110451	uuid:8ddca24d-3f74-4598-984a-e45266f244ab	23	Yes	33	Nick	30	12	9	12	50	35-44	Female	Cannot read and write	None/never attended school	Did not work and didn't looked for a job	Okunraye			No	No	No	No	No	Yes	Crop\ fish processing for selling and eating	Yes	2		Yes	Yes	No			Yes	Yes	Yes	Yes	Yes	Yam	12000	37500	15000	22500	22500
a9f85941d979a989	1259	2017-08-12 13:29:12	2017-08-12 13:50:11	2017-08-12 21:48:32	1708110451	uuid:93c3a878-f797-4210-ba7f-ccc51eb81959	24	Yes	27	Nick	12	5	2	5	45	35-44	Male	Can read and write	Primary	Worked without pay (apprentice, family business, etc…)	Okunraye			No	Yes	Yes	No	No	No		Yes	10		Yes	Yes	No			Yes	Yes	Yes	Yes	Yes	Mango pineapple cashew	4800	1500	5000	2500	2500
a9f85941d979a989	1307	2017-08-12 13:04:29	2017-08-12 13:26:16	2017-08-12 21:48:31	1708110451	uuid:a3ff81da-c6a4-4d72-ba20-7c862f7b9f4f	25	Yes	25	Nick	47	15	7	20	34	25-34	Male	Can read and write	Primary	Worked for pay (salary, wage, self-employed)	Okunraye			No	No	No	No	No	Yes	Land agent (help people find homes and land)	Yes	2		Yes	Yes	No			Yes	Yes	Yes	Yes	Yes	Pineapple yam guava vegetables cocoyam	24000	12500	10000	50000	50000
861598034197054	1371	2017-08-12 12:36:49	2017-08-12 12:59:40	2017-08-12 22:14:37	1708110451	uuid:c50275b0-5ab2-4f8a-b227-88804daa3af7	26	Yes	22	Yakubu	30	20	2	14	67	65+	Male	Cannot read and write	None/never attended school	Did not work and didn't looked for a job	Okunraye			No	No	No	No	No	No		Yes	2		Yes	Yes	No			Yes	No	Yes	No	Yes	Vegetables plantain	1000		600		0
a9f85941d979a989	1491	2017-08-12 14:11:01	2017-08-12 14:35:52	2017-08-12 21:48:33	1708110451	uuid:cea8615f-c4c2-41f5-932c-5cbbd4bb91ba	27	Yes	31	Nick	15	10	5	8	65	65+	Male	Can read and write	Primary	Did not work and didn't looked for a job	Okunraye			No	No	No	No	No	No		Yes	5		Yes	Yes	No			Yes	Yes	Yes	Yes	Yes	Sweet potatoes onions tomatoes rice	4000	10000	15000	22850	22850
861598034197054	578	2017-08-12 14:20:36	2017-08-12 14:30:14	2017-08-12 22:14:40	1708110451	uuid:22014f41-4730-45bb-85a5-d6ad26773869	28	Yes	38	Yakubu	25	6	4	17	56	45-54	Male	Can read and write	Secondary	Did not work but looked for a job	Okunraye			No	Yes	Yes	No	No	No		Yes	12		Yes	Yes	No			Yes	Yes	Yes	No	Yes	Okro beans vegetables	6000	0	8000		0
861598034197054	748	2017-08-12 13:55:27	2017-08-12 14:07:55	2017-08-12 22:14:39	1708110451	uuid:240d98cc-cb05-4833-88bd-270c92f382e2	29	Yes	32	Yakubu	15	6	6	7	50	35-44	Male	Can sign (write) only	Secondary	Worked without pay (apprentice, family business, etc…)	Okunraye			No	No	Yes	No	No	No		Yes	5		Yes	Yes	No			No	No	Yes	No	Yes	Banana palm oil trees			3500		0
861598034197054	992	2017-08-12 13:00:35	2017-08-12 13:17:06	2017-08-12 22:14:37	1708110451	uuid:39876035-b16d-4a32-aece-595f10ba6aad	30	Yes	24	Yakubu	57	21	7	28	55	45-54	Male	Cannot read and write	None/never attended school	Did not work and didn't looked for a job	Okunraye			No	No	No	No	No	No		Yes	61		Yes	Yes	No			Yes	No	Yes	No	Yes	Melon other vegetables fresh water fishing	2000		2000		0
861598034197054	650	2017-08-12 13:44:26	2017-08-12 13:55:16	2017-08-12 22:14:39	1708110451	uuid:6ca13db4-75fd-4b75-8408-7e284d1643c2	31	Yes	30	Yakubu	30	8	4	10	33	25-34	Male	Can read and write	Secondary	Worked for pay (salary, wage, self-employed)	Okunraye			No	Yes	No	No	No	No		Yes	10		Yes	Yes	No			Yes	No	Yes	No	Yes	Green Vegetables water melon tomatoes	5000		10000		0
861598034197054	719	2017-08-12 14:08:10	2017-08-12 14:20:09	2017-08-12 22:14:39	1708110451	uuid:90415182-029e-4f81-8f24-ea5288ce4ff7	32	Yes	34	Yakubu	25	6	3	14	54	45-54	Male	Can read and write	Primary	Worked without pay (apprentice, family business, etc…)	Okunraye			No	No	Yes	No	No	No		Yes	5		Yes	Yes	No			Yes	No	No	No	Yes	Plantain mango palm oil vegetables	4500				0
861598034197054	1937	2017-08-12 12:01:51	2017-08-12 12:34:08	2017-08-12 22:14:36	1708110451	uuid:acfe52a6-f5b5-45ed-912d-006649279ec3	33	Yes	20	Yakubu	20	8	4	3	54	45-54	Male	Can read and write	Secondary	Worked without pay (apprentice, family business, etc…)	Okunraye			No	No	Yes	No	No	No		Yes	0.04		Yes	Yes	No			No	No	Yes	No	No				0
861598034197054	591	2017-08-12 14:34:18	2017-08-12 14:44:09	2017-08-12 22:14:40	1708110451	uuid:bca5cb08-4285-409e-890b-28b1e406a3a6	34	Yes	40	Yakubu	20	9	11	7	85	65+	Male	Cannot read and write	None/never attended school	Did not work and didn't looked for a job	Okunraye			No	No	No	No	No	No		Yes	1.5		Yes	Yes	No			Yes	Yes	Yes	No	Yes	Rice banana plantain	0	0	0		0
861598034197054	767	2017-08-12 13:30:29	2017-08-12 13:43:16	2017-08-12 22:14:38	1708110451	uuid:e72d70af-b555-4d74-b452-f47a78fcd227	35	Yes	28	Yakubu	50	20	6	10	65	65+	Male	Can sign (write) only	Primary	Worked without pay (apprentice, family business, etc…)	Okunraye			No	Yes	No	No	No	No		Yes	6		Yes	Yes	No			Yes	No	Yes	No	Yes	Banana efo yam egusi beans millet	3000		5000		0
861598034197054	776	2017-08-12 13:17:13	2017-08-12 13:30:09	2017-08-12 22:14:38	1708110451	uuid:ec3370a3-2ddf-46c2-90db-e768eb85a89a	36	Yes	26	Yakubu	61	10	15	12	70	65+	Male	Can sign (write) only	Primary	Did not work and didn't looked for a job	Okunraye			No	No	No	No	No	No		Yes	5		Yes	Yes	No			Yes	No	Yes	No	Yes	Vegetables sweet potatoes	1000		0		0
861598034197054	1159	2017-08-15 10:31:45	2017-08-15 10:51:04	2017-08-15 18:35:20	1708141236	uuid:2de5d940-a7fe-45ec-bbdd-8f7dee667eab	37	Yes	37	Yakubu	40	6	3	15	65	65+	Male	Can read and write	Primary	Did not work and didn't looked for a job	Tiye			Yes	No	No	No	No	No		Yes	30		Yes	Yes	No			No	Yes	Yes	No	Yes	Kolanut yam cocoyam vegetables potatoes		40000	40000		1800
861598034197054	1044	2017-08-15 12:46:01	2017-08-15 13:03:24	2017-08-15 18:35:22	1708141236	uuid:365eb6ef-73eb-4657-936e-04957fc77a29	38	Yes	53	Yakubu	30	15	10	10	46	35-44	Male	Can read and write	Secondary	Did not work but looked for a job	Tiye			No	No	No	No	No	Yes	Security officer	Yes	2		Yes	Yes	No			Yes	Yes	Yes	Yes	Yes	Cashew potatoes coconut cocoa	1600	2400	22500	Don't Know	Don't Know
861598034197054	534	2017-08-15 15:46:37	2017-08-15 15:55:31	2017-08-15 18:35:25	1708141236	uuid:6ec806d5-a7a4-4a4f-8f4c-202f383f04c9	39	Yes	63	Yakubu	100	23	19	70	36	25-34	Male	Cannot read and write	None/never attended school	Did not work but looked for a job	Idasho			No	Yes	No	No	No	No		Yes	40		Yes	Yes	No			Yes	No	Yes	No	Yes	Mango citrus fish pond	12000		92160		Don't Know
861598034197054	821	2017-08-15 15:16:25	2017-08-15 15:30:06	2017-08-15 18:35:23	1708141236	uuid:9ceaa31d-c440-46c5-b020-a8a4365706fe	40	Yes	58	Yakubu	35	20	7	6	70	65+	Male	Cannot read and write	None/never attended school	Did not work and didn't looked for a job	Idasho			No	No	No	No	No	No		Yes	7.5		Yes	Yes	No			Yes	Yes	Yes	No	Yes	Melon vegetables citrus	6800	540	22000		Don't Know
861598034197054	596	2017-08-15 10:51:22	2017-08-15 11:01:18	2017-08-15 18:35:21	1708141236	uuid:a55a466a-0fbd-4a7d-b19e-14c88024fcc1	41	Yes	40	Yakubu	50	20	10	20	58	45-54	Male	Can read and write	Secondary	Worked without pay (apprentice, family business, etc…)	Tiye			No	No	No	No	No	Yes	Businessman	Yes	10		Yes	Yes	No			No	No	Yes	No	Yes	Yam banana potatoes coconut oil and			18000		15000
861598034197054	1633	2017-08-15 11:50:16	2017-08-15 12:17:29	2017-08-15 18:35:22	1708141236	uuid:a8d9258d-226e-4a09-aaf2-a27077ccf9e6	42	Yes	46	Yakubu	10	5	0	2	40	25-34	Male	Can read and write	Secondary	Worked without pay (apprentice, family business, etc…)	Tiye			No	No	No	No	Yes	No		Yes	1.5		Yes	Yes	No			Yes	Yes	Yes	No	Yes	Rice guava coconut potatoes cocoyam	22400	1000	6400		Don't Know
861598034197054	697	2017-08-15 11:01:35	2017-08-15 11:13:12	2017-08-15 18:35:21	1708141236	uuid:ba9ed402-e62d-4fe9-9367-7c5a7702ea91	43	Yes	41	Yakubu	15	10	1	14	54	45-54	Male	Can read and write	Higher	Did not work but looked for a job	Tiye			Yes	No	No	No	No	No		Yes	2		Yes	Yes	No			No	No	Yes	No	Yes	Banana potatoes fishery			800		60
861598034197054	519	2017-08-15 15:30:31	2017-08-15 15:39:10	2017-08-15 18:35:24	1708141236	uuid:ce8b8bcc-73b5-47b4-9c2c-ada811b56f76	44	Yes	60	Yakubu	55	8	10	32	63	45-54	Male	Cannot read and write	None/never attended school	Did not work but looked for a job	Idasho			No	No	No	No	No	No		Yes	1.5		Yes	Yes	No			Yes	No	Yes	No	Yes	Cocoa coconut orange fruits kolanut mango fish pond banana snail	134400		111000		Don't Know
861598034197054	792	2017-08-15 14:00:22	2017-08-15 14:13:34	2017-08-15 18:35:23	1708141236	uuid:ef55969f-9f6d-4db9-98d4-e22f59973cd8	45	Yes	54	Yakubu	25	15	5	10	35	25-34	Female	Can read and write	Primary	Worked without pay (apprentice, family business, etc…)	Idasho			No	No	No	No	No	Yes	Petty business	Yes	2		Yes	Yes	No			No	No	Yes	No	Yes	Vegetables yam coconut banana			36000		Don't Know
861598034197054	921	2017-08-15 12:18:33	2017-08-15 12:33:54	2017-08-15 18:35:22	1708141236	uuid:fb02e633-d116-4914-aafa-c08e1f3508cd	46	Yes	49	Yakubu	85	35	22	18	64	55-64	Female	Can read and write	Primary	Worked without pay (apprentice, family business, etc…)	Tiye			No	No	No	Yes	No	No		Yes	1.75		Yes	Yes	No			Yes	No	Yes	Yes	Yes	Mango guava palm oil vegetables	24000		28000	Don't Know	Don't Know
861598034197054	436	2017-08-15 15:39:15	2017-08-15 15:46:32	2017-08-15 18:35:24	1708141236	uuid:04d48d01-9fee-4226-911c-06b33b9f5062	47	Yes	61	Yakubu	50	30	25	30	75	65+	Male	Cannot read and write	None/never attended school	Did not work and didn't looked for a job	Idasho			No	No	No	No	No	No		Yes	4		Yes	Yes	No			Yes	No	No	No	Yes	Kolanut orange pineapple cocoyam	14400				Don't Know
a9f85941d979a989	1295	2017-08-15 11:03:25	2017-08-15 11:25:00	2017-08-15 18:49:03	1708141236	uuid:243cdc0a-74f5-4222-a69a-6b3162b5e7d0	48	Yes	42	Nick	10	3	3	10	65	65+	Male	Can read and write	Secondary	Did not work and didn't looked for a job	Tiye			No	Yes	No	No	No	Yes	Retired	Yes	10		Yes	Yes	No			Yes	Yes	Yes	Yes	Yes	Palm kanal rice yam beans	1600	250	1500	1850	1850
a9f85941d979a989	1314	2017-08-15 11:25:29	2017-08-15 11:47:23	2017-08-15 18:49:03	1708141236	uuid:61bda9b8-c076-4ea8-8a24-e3d2024f620a	49	Yes	44	Nick	26	15	10	16	53	35-44	Male	Can read and write	Secondary	Worked for pay (salary, wage, self-employed)	Tiye			No	Yes	Yes	Yes	Yes	No		Yes	6		Yes	Yes	No			Yes	Yes	Yes	Yes	Yes	Potatoes yams tomatoes cocoyam vegetables carrots	4800	1500	4000	11250	11250
861598034197054	685	2017-08-15 16:03:47	2017-08-15 16:15:13	2017-08-15 18:35:26	1708141236	uuid:64c56bb6-12d7-4f22-a89c-54e27009948d	50	Yes	67	Yakubu	80	45	20	30	38	25-34	Male	Cannot read and write	None/never attended school	Did not work and didn't looked for a job	Idasho			No	Yes	No	No	No	No		Yes	8		Yes	Yes	No			Yes	Yes	Yes	No	Yes	Pineapple cocoyam potatoes sweet cocoa rice	7200	7680	46080		Don't Know
861598034197054	709	2017-08-15 16:27:11	2017-08-15 16:39:00	2017-08-15 18:35:29	1708141236	uuid:6f3e90f8-18cd-4c58-bff6-eb6b106114e2	51	Yes	69	Yakubu	80	20	40	15	99	65+	Male	Cannot read and write	None/never attended school	Did not work and didn't looked for a job	Idasho			No	No	No	No	No	No		Yes	2		Yes	Yes	No			Yes	No	Yes	No	No		15200		21000
a9f85941d979a989	1881	2017-08-15 10:31:41	2017-08-15 11:03:02	2017-08-15 18:49:02	1708141236	uuid:719219fa-e3d6-48d9-ae0d-27b1effbe979	52	Yes	38	Nick	30	20	10	17	49	35-44	Male	Cannot read and write	Primary	Worked for pay (salary, wage, self-employed)	Tiye			No	Yes	Yes	No	No	Yes	Sells CDs and rent music instrument	Yes	20		Yes	Yes	No			Yes	Yes	Yes	Yes	Yes	Yams sweet potatoes vegetables melon rice	8000	300	80000	5300	5300
861598034197054	688	2017-08-15 16:15:17	2017-08-15 16:26:45	2017-08-15 18:35:28	1708141236	uuid:72f94603-d807-439e-b27a-a67022faa31f	53	Yes	69	Yakubu	100	50	10	20	75	65+	Male	Can read and write	Primary	Did not work and didn't looked for a job	Idasho			No	No	No	No	No	No		Yes	16		Yes	Yes	No			Yes	Yes	Yes	No	Yes	Plantain banana cocoyam	34560	15000	18000		400
861598034197054	454	2017-08-15 15:55:38	2017-08-15 16:03:13	2017-08-15 18:35:25	1708141236	uuid:e9f17e8e-82b0-43da-8976-396a3e0429b8	54	Yes	65	Yakubu	100	80	70	65	45	35-44	Male	Can read only	Primary	Worked without pay (apprentice, family business, etc…)	Idasho			No	No	Yes	No	No	No		Yes	10		Yes	Yes	No			Yes	Yes	Yes	No	Yes	Cassavas orange mango coconut	12000	16000	48000		Don't Know
a9f85941d979a989	862	2017-08-15 12:04:28	2017-08-15 12:18:50	2017-08-15 18:49:04	1708141236	uuid:2d4d9a4d-959f-49f6-982a-8fbcafda8d8f	55	Yes	48	Nick	25	10	3	15	41	25-34	Male	Can read and write	Secondary	Worked for pay (salary, wage, self-employed)	Tiye			No	No	No	No	Yes	No		Yes	25		Yes	Yes	No			Yes	No	Yes	Yes	Yes	Melon vegetables	16000		10000	10000	10000
a9f85941d979a989	930	2017-08-15 15:58:00	2017-08-15 16:13:30	2017-08-15 18:49:08	1708141236	uuid:4afd525e-3ab4-45b1-b8d6-3dc7a0708ca0	56	Yes	61	Nick	20	10	5	7	50	35-44	Male	Can read and write	Primary	Worked for pay (salary, wage, self-employed)	Idasho			No	Yes	Yes	No	Yes	No		Yes	10		Yes	Yes	No			Yes	Yes	Yes	Yes	Yes	Coconut vegetables pineapple paupau tomatoes	2400	750	10000	12250	12250
a9f85941d979a989	1285	2017-08-15 15:16:21	2017-08-15 15:37:45	2017-08-15 18:49:07	1708141236	uuid:5516dd5f-8fc5-4350-93d4-f5dc5af4b988	57	Yes	55	Nick	40	15	4	10	55	45-54	Male	Can read and write	Higher	Did not work and didn't looked for a job	Idasho			No	No	No	No	No	No		Yes	10		Yes	Yes	No			Yes	Yes	Yes	Yes	Yes	Mango orange coconut kolanuts pineapple banana	16000	15000	30000	85000	85000
a9f85941d979a989	1361	2017-08-15 13:03:03	2017-08-15 13:25:45	2017-08-15 18:49:06	1708141236	uuid:6553068a-e5de-4364-923f-e72050700f9b	58	Yes	53	Nick	7	3	3	22	46	35-44	Male	Can read and write	Secondary	Worked for pay (salary, wage, self-employed)	Ilekuru			No	Yes	Yes	No	Yes	Yes	Jaga group of companies employee	Yes	2		Yes	Yes	No			Yes	Yes	Yes	Yes	Yes	Mangos bananas palmkernel coconut	8000	2500	10000	20000	20000
a9f85941d979a989	1078	2017-08-15 16:28:12	2017-08-15 16:46:10	2017-08-15 18:49:09	1708141236	uuid:6f53d132-67ac-4e69-96a5-556eefcbd33a	59	Yes	66	Nick	50	15	40	30	50	35-44	Male	Cannot read and write	None/never attended school	Worked for pay (salary, wage, self-employed)	Idasho			No	No	No	No	Yes	No		Yes	50		Yes	Yes	No			Yes	Yes	Yes	Yes	Yes	Yams cocoa coconut kolanut	4000	4000	4000	4900	4900
a9f85941d979a989	764	2017-08-15 12:18:59	2017-08-15 12:31:43	2017-08-15 18:49:05	1708141236	uuid:73d704e1-0e89-49a2-b09b-f6ac3a5337e3	60	Yes	50	Nick	100	10	4	20	60	45-54	Male	Cannot read and write	None/never attended school	Worked without pay (apprentice, family business, etc…)	Tiye			No	Yes	Yes	No	No	No		Yes	5		Yes	Yes	No			Yes	Yes	Yes	Yes	Yes	Yams banana cocoyam sweet potatoes	800	200	1000	1000	1000
a9f85941d979a989	658	2017-08-15 16:13:48	2017-08-15 16:24:47	2017-08-15 18:49:08	1708141236	uuid:7ff850df-df10-4ab7-a554-f4211421cf17	61	Yes	63	Nick	100	20	25	20	80	65+	Female	Cannot read and write	None/never attended school	Worked without pay (apprentice, family business, etc…)	Idasho			No	Yes	Yes	Yes	Yes	No		Yes	14		Yes	Yes	No			Yes	Yes	Yes	Yes	Yes	Yam plantain coconut vegetables kolanuts mango	24000	1000	12500	12000	12000
a9f85941d979a989	1187	2017-08-15 15:38:00	2017-08-15 15:57:47	2017-08-15 18:49:07	1708141236	uuid:a56fb48c-66a8-4bd5-bece-390cbfec37b8	62	Yes	57	Nick	12	3	7	8	68	65+	Male	Cannot read and write	Primary	Did not work and didn't looked for a job	Idasho			No	No	No	No	No	No		Yes	60		Yes	Yes	No			Yes	Yes	Yes	Yes	Yes	Cocoyam palm oil mango cashew orange plantain coconut paupau pineapple	4000	2500	36000	17500	17500
a9f85941d979a989	1587	2017-08-15 12:35:51	2017-08-15 13:02:19	2017-08-15 18:49:05	1708141236	uuid:d0b4aa66-5e34-47fc-bf82-959ce606bd74	63	Yes	51	Nick	22	6	4	13	68	65+	Male	Can read and write	Primary	Worked for pay (salary, wage, self-employed)	Tiye			No	Yes	Yes	No	No	Yes	Battery cbarger	Yes	12.5		Yes	Yes	No			Yes	Yes	Yes	Yes	Yes	Pine apple coconut sugarcane cocoyam	16000	10000	25000	15250	15250
a9f85941d979a989	982	2017-08-15 11:47:27	2017-08-15 12:03:48	2017-08-15 18:49:04	1708141236	uuid:ea437987-a851-4ef5-817c-29c4dd6e4b31	64	Yes	45	Nick	42	26	5	29	32	25-34	Male	Cannot read and write	Secondary	Worked for pay (salary, wage, self-employed)	Tiye			No	No	No	No	Yes	No		Yes	6		Yes	Yes	No			Yes	Yes	Yes	Yes	Yes	Potatoes yams mango guavas banana cocoa coconut kolanut	4000	2000	28000	74250	74250
7bdabb0ed70b6ce6	1963	2017-08-15 12:45:38	2017-08-15 13:18:20	2017-08-15 21:41:09	1708141236	uuid:0755667b-de86-4114-a03e-bc27ba177392	65	Yes	52	Tobi	33	13	9	16	44	35-44	Male	Can read and write	Higher	Worked for pay (salary, wage, self-employed)	Tiye			No	Yes	Yes	Yes	Yes	No		Yes	58.6		Yes	Yes	No			No	No	Yes	Yes	No				2250	12160
7bdabb0ed70b6ce6	2837	2017-08-15 11:16:21	2017-08-15 12:03:38	2017-08-15 21:41:08	1708141236	uuid:3f9f7f28-3801-450d-9843-917423b7a8a2	66	Yes	43	Tobi	14	7	8	5	59	45-54	Male	Can read and write	Secondary	Worked for pay (salary, wage, self-employed)	Tiye			No	Yes	Yes	No	Yes	Yes	Civil servant	Yes	10		Yes	Yes	No			Yes	No	Yes	No	Yes	Cocoyam, coconut, melon, water melon	20000		9000		1200
7bdabb0ed70b6ce6	635	2017-08-15 16:14:33	2017-08-15 16:25:08	2017-08-15 21:41:11	1708141236	uuid:44a2f571-bfbc-480e-8c8e-682a8ee3c02c	67	Yes	64	Magbagbeola	30	10	8	8	50	35-44	Female	Cannot read and write	None/never attended school	Did not work and didn't looked for a job	Idasho			No	Yes	No	No	No	No		Yes	10		Yes	Yes	No			Yes	Yes	Yes	No	Yes	Cocoa sweet potatoes lemon pineapple oranges Coconut Palm kernel	2500	25000	25000		150000
7bdabb0ed70b6ce6	519	2017-08-15 16:25:41	2017-08-15 16:34:20	2017-08-15 21:41:12	1708141236	uuid:47364c8e-bc07-4ce3-a79f-d4ca44c1f17f	68	Yes	65	Magbagbeola	15	9	4	0	73	65+	Female	Cannot read and write	None/never attended school	Worked for pay (salary, wage, self-employed)	Idasho			No	Yes	No	Yes	No	No		Yes	10		Yes	Yes	No			Yes	Yes	Yes	No	Yes	Cocoa sweet potatoes vegetable pepper tomatoes	640	800	50		250
7bdabb0ed70b6ce6	5572	2017-08-15 14:02:16	2017-08-15 15:35:08	2017-08-15 21:41:09	1708141236	uuid:7283384e-753f-4ba9-b194-6a144ac2d072	69	Yes	55	Magbagbeola	20	4	5	8	38	25-34	Male	Can read and write	Secondary	Worked for pay (salary, wage, self-employed)	Idasho			No	No	Yes	No	No	No		Yes	15		Yes	Yes	No			Yes	Yes	Yes	Yes	Yes	Vegetable oranges mango coconut pine Apple Kolanut cocoa cashew	960	1000	12000	14000	14000
7bdabb0ed70b6ce6	1354	2017-08-15 15:51:41	2017-08-15 16:14:15	2017-08-15 21:41:10	1708141236	uuid:781fb48b-528f-4147-b8bb-e0e210aa6f73	70	Yes	61	Magbagbeola	40	20	5	25	50	35-44	Female	Can read and write	Primary	Worked for pay (salary, wage, self-employed)	Idasho			No	Yes	Yes	Yes	No	No		Yes	50		Yes	Yes	No			Yes	Yes	Yes	Yes	Yes	Kolanut cocoa banana coconut yam ogbona tomatoes sweet potatoes pepper	4000	9000	8000	375000	375000
7bdabb0ed70b6ce6	2415	2017-08-15 12:04:57	2017-08-15 12:45:12	2017-08-15 21:41:08	1708141236	uuid:aedcf886-e24f-42b6-ae0f-aec74192b050	71	Yes	47	Tobi	35	8	6	15	40	25-34	Male	Can read and write	Secondary	Worked for pay (salary, wage, self-employed)	Tiye			No	Yes	Yes	No	Yes	No		Yes	49		Yes	Yes	No			Yes	No	Yes	Yes	No		2560		1050	160
7bdabb0ed70b6ce6	6107	2017-08-14 19:31:01	2017-08-15 19:17:28	2017-08-15 21:41:07	1708141236	uuid:f7c8c11e-1ad5-4287-80f3-a7855426d892	72	Yes	39	Tobi	7	4	1	3	43	25-34	Male	Can read only	Primary	Worked for pay (salary, wage, self-employed)	Tiye			Yes	No	No	No	Yes	No		Yes	80		Yes	Yes	No			Yes	No	Yes	No	Yes	Coconut trees, Palm trees, Kolanut trees, Prepfruit	16000		10000		4000
7bdabb0ed70b6ce6	978	2017-08-15 15:35:12	2017-08-15 15:51:29	2017-08-15 21:41:10	1708141236	uuid:fead08fe-a4f6-47ec-9032-65282ffa5286	73	Yes	60	Magbagbeola	30	10	8	20	45	35-44	Male	Can read and write	Secondary	Worked for pay (salary, wage, self-employed)	Idasho			No	No	No	No	No	Yes	Surveyor	Yes	50		Yes	Yes	No			Yes	Yes	Yes	No	Yes	Kolanut cocoa pineapple coconut oranges Palm kernel melon ogbona sugarcane sweet potatoes mango pepper cashew	12000	5000	60000		330000
861598034197054	886	2017-08-16 12:21:30	2017-08-16 21:43:57	2017-08-16 21:46:37	1708151239	uuid:19b21078-452b-4ff4-9430-dc6da40fa704	74	Yes	75	Yakubu	23	6	7	22	75	65+	Male	Can read and write	Higher	Worked without pay (apprentice, family business, etc…)	Ilekuru			No	Yes	No	No	No	No		Yes	6		Yes	Yes	No			Yes	Yes	Yes	No	Yes	Groundnuts okro vegetables	960	560	890		Don't Know
861598034197054	816	2017-08-16 12:50:46	2017-08-16 21:46:00	2017-08-16 21:46:38	1708151239	uuid:1b85bd87-d07e-4947-aa44-a2d3d60ea593	75	Yes	77	Yakubu	12	8	1	2	47	35-44	Male	Can read and write	Primary	Worked without pay (apprentice, family business, etc…)	Ilekuru			No	No	No	No	No	Yes	Driver commercial	Yes	6		Yes	Yes	No			Yes	Yes	Yes	No	Yes	Vegetables	192000	32000	115200		Don't Know
a9f85941d979a989	870	2017-08-16 13:20:50	2017-08-16 13:35:20	2017-08-16 20:52:52	1708151239	uuid:27f84688-89e9-470c-93c7-6d8c7ecb43ad	76	Yes	80	Nick	15	12	1	8	53	35-44	Male	Can read and write	Secondary	Worked for pay (salary, wage, self-employed)	Ilekuru			No	No	No	No	No	Yes	Mason	Yes	7		Yes	Yes	No			Yes	Yes	Yes	Yes	Yes	Banana beans	8000	500	750	37500	4550
a9f85941d979a989	1288	2017-08-16 12:42:51	2017-08-16 13:04:19	2017-08-16 20:52:52	1708151239	uuid:2849bca4-3215-4727-9d48-ba03fb63a65d	77	Yes	78	Nick	100	15	55	80	78	65+	Male	Can read and write	Secondary	Did not work and didn't looked for a job	Ilekuru			No	No	No	No	No	No		Yes	60		Yes	Yes	No			Yes	Yes	Yes	Yes	Yes	Melon coconut palm oil vegetables mango yam paupau sugarcane	8000	7500	15000	45200	45200
a9f85941d979a989	7666	2017-08-16 10:34:57	2017-08-16 12:42:43	2017-08-16 20:52:51	1708151239	uuid:51be9914-2450-4122-bb1b-d771814bed2e	78	Yes	76	Nick	55	11	25	27	72	65+	Male	Can read and write	Primary	Did not work and didn't looked for a job	Ilekuru			No	No	No	No	No	No		Yes	50		Yes	Yes	No			Yes	Yes	Yes	Yes	Yes	Mango kolanuts banana pineapple paupau cashew apple vegetables melon	480	250	10000	803	803
861598034197054	850	2017-08-16 13:03:54	2017-08-16 13:18:05	2017-08-16 21:46:38	1708151239	uuid:717930f5-ff19-4d56-9010-5e9d504b7d04	79	Yes	79	Yakubu	25	3	4	7	42	25-34	Male	Can read and write	Secondary	Worked without pay (apprentice, family business, etc…)	Ilekuru			No	No	No	No	No	Yes	Businessman	Yes	26		Yes	Yes	No			Yes	Yes	Yes	No	Yes	Vegetables	18000	14400	48000		Don't Know
861598034197054	915	2017-08-16 12:34:56	2017-08-16 21:45:09	2017-08-16 21:46:37	1708151239	uuid:9b6b7eed-d22f-4a90-821e-7d7400bcc913	80	Yes	77	Yakubu	23	7	4	10	64	55-64	Male	Can read and write	Higher	Worked without pay (apprentice, family business, etc…)	Ilekuru			No	No	No	Yes	No	No		Yes	0.003		Yes	Yes	No			Yes	Yes	Yes	No	Yes	Mango kolanut melon	2400	800	9600		Don't Know
a9f85941d979a989	817	2017-08-16 13:35:58	2017-08-16 13:49:35	2017-08-16 20:52:53	1708151239	uuid:9cd16a28-7e25-446c-ab16-9f51c8673805	81	Yes	81	Nick	65	32	9	18	38	25-34	Male	Can read and write	Higher	Worked for pay (salary, wage, self-employed)	Ilekuru			No	No	No	No	No	Yes	Civil servant	Yes	15		Yes	Yes	No			Yes	Yes	Yes	Yes	Yes	Cocoyam beans palm kernal vegetables banana	8000	1250	6500	12500	12500
7bdabb0ed70b6ce6	467	2017-08-15 16:42:08	2017-08-15 16:49:55	2017-08-15 21:41:12	1708141236	uuid:b52a118d-4484-4523-ba41-28654f1192d6	82	Yes	67	Magbagbeola	25	6	12	12	45	35-44	Male	Cannot read and write	Primary	Worked for pay (salary, wage, self-employed)	Idasho			No	Yes	No	No	Yes	Yes	Bricklayer and Mechanic	Yes	50		Yes	Yes	No			Yes	No	Yes	No	Yes	Vegetables	1600		5000		2500
a9f85941d979a989	980	2017-08-16 13:04:23	2017-08-16 13:20:43	2017-08-16 20:52:52	1708151239	uuid:d6109e5f-2f49-4fe6-b03a-0c6ad4c86789	83	Yes	79	Nick	14	3	2	9	55	45-54	Male	Cannot read and write	Primary	Worked for pay (salary, wage, self-employed)	Ilekuru			No	Yes	Yes	No	No	Yes	Driver	Yes	6		Yes	Yes	No			Yes	No	Yes	Yes	Yes	Banana mango cashew palmkernel	3200		22500	1670	1670
a9f85941d979a989	577	2017-08-17 15:12:33	2017-08-17 15:22:10	2017-08-17 18:46:08	1708151239	uuid:1d312e18-f272-478b-8cc1-c3f11c3dc729	84	Yes	87	Nick	20	10	10	15	75	65+	Male	Cannot read and write	Primary	Did not work and didn't looked for a job	Idotun			No	No	No	No	No	No		Yes	1		Yes	Yes	No			Yes	No	Yes	Yes	Yes	Melon yams	2400		2500	6000	6000
861598034197054	1055	2017-08-16 13:18:37	2017-08-16 13:36:12	2017-08-16 21:46:38	1708151239	uuid:21e13917-7527-4794-a6a2-a3e3e52fa61b	85	Yes	79	Yakubu	20	4	16	12	68	65+	Male	Can read and write	Primary	Worked without pay (apprentice, family business, etc…)	Ilekuru			No	No	No	Yes	No	No		Yes	0.75		Yes	Yes	No			Yes	Yes	Yes	No	Yes	Beans coconut kolanut cashew palm kernel	2400	1200	1500		Don't Know
a9f85941d979a989	772	2017-08-17 15:22:18	2017-08-17 15:35:11	2017-08-17 18:46:09	1708151239	uuid:486cb43d-a9f2-4807-9615-f20c52eb62b1	86	Yes	87	Nick	50	25	10	30	56	45-54	Male	Can read and write	Secondary	Worked for pay (salary, wage, self-employed)	Idotun			No	No	Yes	No	No	Yes	Security officer	Yes	150		Yes	Yes	No			Yes	No	Yes	Yes	Yes	Beans paupau vegetable banana fish pond	16000		12000	41500	41500
a9f85941d979a989	505	2017-08-17 16:11:38	2017-08-17 16:20:02	2017-08-17 18:46:12	1708151239	uuid:7c247ad0-0f66-464e-860a-3386a7cb8abc	87	Yes	92	Nick	60	20	20	40	45	35-44	Female	Can read and write	Primary	Did not work and didn't looked for a job	Idotun			No	No	No	No	No	No		Yes	10		Yes	Yes	No			No	No	Yes	Yes	No				10000	1500
a9f85941d979a989	1464	2017-08-17 14:37:57	2017-08-17 15:02:21	2017-08-17 18:46:07	1708151239	uuid:94fbfb1c-3465-4fb7-8848-f126ac1569c5	88	Yes	85	Nick	50	20	30	25	60	45-54	Male	Can read and write	Primary	Worked for pay (salary, wage, self-employed)	Idotun			No	No	No	No	No	Yes	Security officer	Yes	12		Yes	Yes	No			Yes	No	Yes	Yes	Yes	Yam rice banana	8000		8000	3500	3500
a9f85941d979a989	549	2017-08-17 15:51:26	2017-08-17 16:00:35	2017-08-17 18:46:11	1708151239	uuid:aa477dc6-367a-4012-8de1-7821d0d45b39	89	Yes	38	Nick	38	18	12	16	40	25-34	Male	Can read and write	Higher	Worked for pay (salary, wage, self-employed)	Idotun			No	Yes	Yes	No	No	Yes	Teacher	Yes	120		Yes	Yes	No			Yes	Yes	Yes	Yes	Yes	Vegetables plantain	6400	1200	8000	2800	2800
a9f85941d979a989	302	2017-08-17 15:35:30	2017-08-17 15:40:33	2017-08-17 18:46:09	1708151239	uuid:ac1a1d21-2091-4481-81c7-3d9dca4c8f16	90	Yes	89	Nick	50	30	20	15	61	45-54	Male	Can read and write	Primary	Did not work and didn't looked for a job	Idotun			No	No	No	No	No	No		Yes	50		Yes	Yes	No			No	No	Yes	Yes	Yes	Palm oil			32000	750	750
a9f85941d979a989	599	2017-08-17 15:02:31	2017-08-17 15:12:30	2017-08-17 18:46:08	1708151239	uuid:cbf7e6b6-34f1-4c1e-ac18-f8c48eeeaf7d	91	Yes	86	Nick	50	25	4	20	50	35-44	Male	Can read and write	Secondary	Worked for pay (salary, wage, self-employed)	Idotun			No	Yes	Yes	No	No	Yes	Security	Yes	1.6		Yes	Yes	No			Yes	No	Yes	Yes	Yes	Rice	1250		12000	14500	14500
a9f85941d979a989	606	2017-08-17 15:41:08	2017-08-17 15:51:14	2017-08-17 18:46:10	1708151239	uuid:e3b89133-1e6d-482e-8360-7d1d4846dbfc	92	Yes	90	Nick	50	25	15	25	32	25-34	Male	Can read and write	Secondary	Worked for pay (salary, wage, self-employed)	Idotun			No	No	Yes	No	No	Yes	Security officer	Yes	50		Yes	Yes	No			Yes	No	Yes	Yes	Yes	Mango cashew watermelon melon vegetables	1920		1000	20000	20000
861598034197054	684	2017-08-17 14:55:58	2017-08-17 15:07:22	2017-08-17 19:54:09	1708151239	uuid:02955159-0473-41e9-9541-2ff0987864be	93	Yes	87	Yakubu	50	15	10	14	50	35-44	Male	Can read and write	Secondary	Worked for pay (salary, wage, self-employed)	Idotun			No	No	No	No	No	Yes	Civil servant	Yes	10		Yes	Yes	No			Yes	Yes	Yes	No	Yes	Rice vegetables plantain pineapple	7680	3840	23040		Don't Know
861598034197054	1111	2017-08-17 14:37:17	2017-08-17 14:55:47	2017-08-17 19:54:09	1708151239	uuid:542f4ffc-395d-4287-9251-077e18b1e09d	94	Yes	85	Yakubu	40	15	20	20	61	45-54	Male	Can read and write	Secondary	Worked without pay (apprentice, family business, etc…)	Idotun			No	Yes	Yes	No	No	Yes	Surveyor	Yes	80		Yes	Yes	No			Yes	Yes	Yes	No	Yes	Beans groundnuts vegetables	24000	19200	2000		Don't Know
861598034197054	658	2017-08-17 15:16:23	2017-08-17 15:27:21	2017-08-17 19:54:10	1708151239	uuid:9bad3828-6a85-4374-b2e0-d4e6c75b3a6b	95	Yes	93	Yakubu	200	100	40	52	50	35-44	Male	Can read and write	Primary	Did not work but looked for a job	Idotun			No	No	No	No	No	No		Yes	20		Yes	Yes	No			Yes	No	Yes	No	Yes	Rice pineapple fruits	16000		44000		Don't Know
861598034197054	446	2017-08-17 15:27:28	2017-08-17 15:34:53	2017-08-17 19:54:11	1708151239	uuid:9c6d913f-f520-4be9-9ad5-01c544466a52	96	Yes	97	Yakubu	60	25	12	15	35	25-34	Male	Can read and write	Primary	Worked without pay (apprentice, family business, etc…)	Idotun			No	No	No	No	No	Yes	Bricklayer	Yes	60		Yes	Yes	No			No	No	Yes	No	Yes	Vegetables rice			230800		Don't Know
a9f85941d979a989	620	2017-08-17 16:01:03	2017-08-17 16:11:22	2017-08-17 18:46:12	1708151239	uuid:a55b6e2e-7ff1-4936-8671-ab4018c7ac82	97	Yes	92	Nick	40	15	15	10	42	25-34	Male	Can read and write	Secondary	Worked for pay (salary, wage, self-employed)	Idotun			No	No	No	No	No	Yes	Operator of power plant	Yes	20.2		Yes	Yes	No			Yes	No	Yes	Yes	Yes	Mango plantain palm oil	4480		4480	2700	2700
a9f85941d979a989	571	2017-08-17 16:31:50	2017-08-17 16:41:21	2017-08-17 18:46:13	1708151239	uuid:aa61e1a2-14a0-4b7e-9086-c401374e9969	98	Yes	96	Nick	50	6	25	15	65	65+	Male	Can read and write	Primary	Worked for pay (salary, wage, self-employed)	Idotun			No	No	Yes	No	No	Yes	Mason	Yes	100		Yes	Yes	No			Yes	No	Yes	Yes	No		9600		40000	32500
861598034197054	527	2017-08-17 15:07:30	2017-08-17 15:16:17	2017-08-17 19:54:10	1708151239	uuid:e1c96cc1-1da9-46f1-9aea-0fd96d8138b7	99	Yes	89	Yakubu	47	21	17	19	52	35-44	Male	Can read and write	Secondary	Worked for pay (salary, wage, self-employed)	Idotun			No	No	No	No	No	Yes	Security man	Yes	25		Yes	Yes	No			Yes	No	Yes	No	Yes	Plantain pineapple fishery	20480		38400		Don't Know
a9f85941d979a989	546	2017-08-17 16:20:15	2017-08-17 16:29:22	2017-08-17 18:46:13	1708151239	uuid:f46a7ed8-3a76-4eaf-bd89-61bf03319aea	100	Yes	95	Nick	25	15	10	15	52	35-44	Male	Can read and write	Secondary	Worked without pay (apprentice, family business, etc…)	Idotun			No	Yes	Yes	No	No	Yes	Renter	Yes	50		Yes	Yes	No			Yes	Yes	Yes	Yes	No		9600	9600	20000	7500
861598034197054	556	2017-08-17 15:35:00	2017-08-17 15:44:16	2017-08-17 19:54:11	1708151239	uuid:2aa7251a-7926-4ea6-b5b0-efbbb43add68	101	Yes	99	Yakubu	65	30	35	10	52	35-44	Male	Can read and write	Higher	Worked without pay (apprentice, family business, etc…)	Idotun			No	No	Yes	No	No	No		Yes	112		Yes	Yes	No			Yes	No	Yes	No	Yes	Beans fishery vegetables palm oil fruits	11200		57600		Don't Know
a9f85941d979a989	1008	2017-08-18 10:34:17	2017-08-18 10:51:04	2017-08-18 20:59:48	1708151239	uuid:2c9bbc1f-3f28-4ffb-9eb7-566a568876ff	102	Yes	104	Nick	20	7	6	11	65	65+	Male	Can read and write	Primary	Worked for pay (salary, wage, self-employed)	Itoke			No	No	No	No	No	Yes	Mason	Yes	124.3		Yes	Yes	No			Yes	Yes	Yes	Yes	Yes	Cocoyam vegetables yams potatoes	9600	500	60000	134000	134000
861598034197054	617	2017-08-17 16:01:09	2017-08-17 16:11:26	2017-08-17 19:54:13	1708151239	uuid:33721a04-6482-4d09-a4d0-8dbf4cb0800d	103	Yes	99	Yakubu	60	12	12	20	37	25-34	Male	Can read and write	Secondary	Did not work but looked for a job	Idotun			No	No	No	No	No	Yes	Aluminum works	Yes	32		Yes	Yes	No			Yes	No	Yes	No	Yes	Pineapple palm oil plantain	35840		38400		Don't Know
861598034197054	448	2017-08-17 16:30:26	2017-08-17 16:37:54	2017-08-17 19:54:14	1708151239	uuid:52978713-362d-4de0-a7f1-a22fd88a947b	104	Yes	99	Yakubu	30	10	7	13	34	25-34	Male	Can read and write	Secondary	Worked for pay (salary, wage, self-employed)	Idotun			No	No	No	No	No	Yes	Iron works	Yes	50		Yes	Yes	No			Yes	Yes	Yes	No	Yes	Rice beans fruits banana pineapple orange	72000	48000	60000		Don't Know
861598034197054	467	2017-08-17 15:44:23	2017-08-17 15:52:10	2017-08-17 19:54:12	1708151239	uuid:68707771-d208-4bfb-a5fb-472ad5723617	105	Yes	99	Yakubu	70	15	15	20	40	25-34	Male	Can read and write	Primary	Worked without pay (apprentice, family business, etc…)	Idotun			No	No	No	No	No	Yes	Bricklayer	Yes	200		Yes	Yes	No			Yes	No	Yes	No	Yes	Palm oil vegetables sugarcane fruits plantain	10240		46850		Don't Know
861598034197054	560	2017-08-17 16:20:56	2017-08-17 16:30:16	2017-08-17 19:54:13	1708151239	uuid:7d923b12-1030-41d1-ad21-9f7504463011	106	Yes	99	Yakubu	20	10	8	15	30	25-34	Male	Cannot read and write	Primary	Did not work but looked for a job	Idotun			No	Yes	No	No	No	No		Yes	10		Yes	Yes	No			No	No	Yes	No	Yes	Cashew mango orange coconut			840		Don't Know
861598034197054	555	2017-08-17 16:11:33	2017-08-17 16:20:48	2017-08-17 19:54:13	1708151239	uuid:8307a413-25a0-4ace-b236-732b2c0c9b5d	107	Yes	99	Yakubu	50	22	7	35	32	25-34	Male	Can read and write	Secondary	Worked without pay (apprentice, family business, etc…)	Idotun			No	No	Yes	No	No	No		Yes	10		Yes	Yes	No			Yes	No	Yes	No	Yes	Pineapple sweet potatoes water melon	38400		64000		Don't Know
a9f85941d979a989	1196	2017-08-18 10:14:11	2017-08-18 10:34:07	2017-08-18 20:59:47	1708151239	uuid:abc086bd-9f7b-40ee-a249-190be4f52414	108	Yes	104	Nick	14	7	2	9	45	35-44	Male	Can read and write	Secondary	Did not work but looked for a job	Itoke			No	No	No	No	No	No		Yes	37		Yes	Yes	No			Yes	Yes	Yes	Yes	Yes	Cocoa yam vegetables palm oil raffta	448000	200	40000	61500	61500
861598034197054	523	2017-08-17 15:52:19	2017-08-17 16:01:02	2017-08-17 19:54:12	1708151239	uuid:c0832ed1-ac48-49c2-8a87-1120738b8dfb	109	Yes	99	Yakubu	70	15	12	20	30	25-34	Male	Can read and write	Primary	Worked for pay (salary, wage, self-employed)	Idotun			No	No	No	No	No	Yes	Bulldozer operator	Yes	50		Yes	Yes	No			Yes	Yes	Yes	No	Yes	Beans yam rice vegetables	800	320	4800		Don't Know
a9f85941d979a989	809	2017-08-18 11:24:22	2017-08-18 11:37:52	2017-08-18 20:59:50	1708151239	uuid:099300a1-d51d-4fa1-ad3f-38f7ea42003d	110	Yes	109	Nick	18	6	10	8	68	65+	Male	Can read and write	Primary	Did not work and didn't looked for a job	Itoke			No	No	No	No	No	No		Yes	60.7		Yes	Yes	No			Yes	Yes	Yes	Yes	Yes	Yam plantain	15360	400	12000	4400	4400
a9f85941d979a989	397	2017-08-18 13:33:58	2017-08-18 13:40:35	2017-08-18 20:59:54	1708151239	uuid:265de61a-091e-47c9-bffd-b710e71ab921	111	Yes	110	Nick	42	16	10	24	35	25-34	Male	Can read and write	Secondary	Did not work and didn't looked for a job	Ilege			No	No	No	No	No	No		Yes	8		Yes	Yes	No			Yes	No	Yes	No	Yes	Vegetables	3200		20000		2400
a9f85941d979a989	1326	2017-08-18 11:01:39	2017-08-18 11:23:46	2017-08-18 20:59:49	1708151239	uuid:42d1c0b3-9941-4211-8530-57e3b4219e28	112	Yes	107	Nick	15	10	2	6	34	25-34	Male	Can read and write	Secondary	Worked for pay (salary, wage, self-employed)	Itoke			No	No	No	No	No	Yes	Mechanism	Yes	200		Yes	Yes	No			Yes	Yes	Yes	Yes	Yes	Rice yam potatoes bitterkola kolanuts	51200	16000	36000	29900	29900
a9f85941d979a989	1271	2017-08-18 11:38:15	2017-08-18 11:59:26	2017-08-18 20:59:51	1708151239	uuid:59b80d6a-b23e-4e39-9ac5-fdb5263b6ee1	113	Yes	109	Nick	56	0	8	9	54	45-54	Male	Can read and write	Higher	Worked for pay (salary, wage, self-employed)	Itoke			No	Yes	Yes	No	No	Yes	Engineer	Yes	95		Yes	Yes	No			Yes	Yes	Yes	Yes	Yes	Palm oil kolanut orange potatoes banana yam	2400	1500	10000	46000	46000
861598034197054	700	2017-08-18 10:30:13	2017-08-18 10:41:53	2017-08-19 13:16:03	1708151239	uuid:9271c80f-ec85-4068-ab10-05684884de91	114	Yes	107	Yakubu	13	6	4	5	49	35-44	Male	Can read and write	Higher	Worked for pay (salary, wage, self-employed)	Itoke			No	No	No	No	No	Yes	Civil servant	Yes	0.7		Yes	Yes	No			Yes	Yes	Yes	No	Yes	Bean's melon plantain	2400	1600	12000		Don't Know
a9f85941d979a989	590	2017-08-18 10:51:24	2017-08-18 11:01:14	2017-08-18 20:59:49	1708151239	uuid:c43788c6-f85a-492a-9962-b13f84b37867	115	Yes	106	Nick	15	1	9	3	65	65+	Male	Cannot read and write	None/never attended school	Did not work and didn't looked for a job	Itoke			No	No	No	No	No	No		Yes	23.5		Yes	Yes	No			Yes	No	Yes	Yes	Yes	Melon	38400		11200	2000	2000
a9f85941d979a989	1360	2017-08-18 13:11:10	2017-08-18 13:33:50	2017-08-18 20:59:52	1708151239	uuid:dbe66dd2-9417-4d14-a36a-b9d9c2970bab	116	Yes	110	Nick	25	15	10	10	42	25-34	Male	Can read and write	Secondary	Worked for pay (salary, wage, self-employed)	Ilege			No	No	No	No	No	Yes	House agent	Yes	20		Yes	Yes	No			No	No	Yes	Yes	Yes	Banana			3000	10000	10000
861598034197054	421	2017-08-18 10:42:26	2017-08-18 10:49:27	2017-08-19 13:16:04	1708151239	uuid:ec24dffd-7974-4d55-b9b2-64d91ab0eb39	117	Yes	109	Yakubu	15	8	6	8	45	35-44	Male	Can read and write	Primary	Worked without pay (apprentice, family business, etc…)	Itoke			No	No	Yes	No	No	No		Yes	3		Yes	Yes	No			Yes	No	Yes	No	Yes	Plantain yam	8000		4000		Don't Know
861598034197054	957	2017-08-18 10:12:51	2017-08-18 10:28:48	2017-08-19 13:16:03	1708151239	uuid:efe273f1-4237-407c-aa82-e74f3d751bb7	118	Yes	105	Yakubu	20	15	5	10	73	65+	Male	Can read and write	Higher	Did not work and didn't looked for a job	Itoke			No	No	No	No	No	No		Yes	9		Yes	Yes	No			Yes	No	Yes	No	Yes	Plantain vegetables pineapple	800		8000		0
861598034197054	640	2017-08-18 11:36:35	2017-08-18 11:47:15	2017-08-19 13:16:07	1708151239	uuid:253dca7f-7b7f-4cc9-88f3-88fcb13402da	119	Yes	113	Yakubu	15	5	1	5	50	35-44	Male	Cannot read and write	None/never attended school	Did not work but looked for a job	Itoke			No	Yes	Yes	No	No	No		Yes	1.75		Yes	Yes	No			Yes	No	Yes	No	Yes	Yam melon rice mango cashew	15360		36000		0
861598034197054	398	2017-08-18 11:12:40	2017-08-18 11:19:18	2017-08-19 13:16:06	1708151239	uuid:327b4069-bd41-4af1-ba48-f122d6209d1f	120	Yes	113	Yakubu	30	8	2	9	49	35-44	Male	Can read and write	Secondary	Worked without pay (apprentice, family business, etc…)	Itoke			No	No	Yes	No	No	No		Yes	40		Yes	Yes	No			No	No	Yes	No	Yes	Yam plantain pineapple mango cashew			80000		0
861598034197054	655	2017-08-18 13:22:09	2017-08-18 13:33:03	2017-08-19 13:16:08	1708151239	uuid:496af1fa-4a59-42bd-92f0-4c624ae79862	121	Yes	125	Yakubu	25	9	8	16	53	35-44	Male	Can read and write	Primary	Worked without pay (apprentice, family business, etc…)	Ilege			No	No	No	No	No	Yes	Welding and iron works	Yes	15		Yes	Yes	No			Yes	No	Yes	No	Yes	Vegetables coconut plantain	18000		32000		0
861598034197054	674	2017-08-18 11:19:38	2017-08-18 11:30:52	2017-08-19 13:16:07	1708151239	uuid:60416e86-4332-4828-8d5c-752c5f7c5307	122	Yes	117	Yakubu	12	7	0	6	45	35-44	Male	Can read and write	Secondary	Worked without pay (apprentice, family business, etc…)	Itoke			No	No	No	No	No	Yes	Businessman	Yes	20		Yes	Yes	No			Yes	No	Yes	No	Yes	Water melon vegetables	3000		5600		0
7bdabb0ed70b6ce6	1236	2017-08-18 10:14:49	2017-08-18 21:51:55	2017-08-20 10:55:56	1708151239	uuid:654399fb-6977-4991-a0af-5f0499e2faf5	123	Yes	120	Magbagbeola	20	8	6	9	42	25-34	Male	Can read and write	Secondary	Worked for pay (salary, wage, self-employed)	Itoke			No	Yes	No	No	No	Yes	Hunter	Yes	20		Yes	Yes	No			Yes	Yes	Yes	Yes	Yes	Cashew, yam, rice, sweet potatoes, cocoyam, banana, oranges, coconut, mangoes, Palm kernel	3120	300	2000	20800	20800
861598034197054	663	2017-08-18 11:01:30	2017-08-18 11:12:33	2017-08-19 13:16:06	1708151239	uuid:b8878734-6d4f-4925-9c98-c7ee33419247	124	Yes	113	Yakubu	13	6	0	4	41	25-34	Male	Can read and write	Secondary	Worked for pay (salary, wage, self-employed)	Itoke			No	No	No	No	No	Yes	Security man	Yes	9		Yes	Yes	No			Yes	No	Yes	No	Yes	Yam cocoyam vegetables plantain palm oil	28800		1920000		Don't Know
861598034197054	536	2017-08-18 13:33:09	2017-08-18 13:42:05	2017-08-19 13:16:09	1708151239	uuid:c974e318-2bd0-4f04-8095-6e4ea6e372a2	125	Yes	135	Yakubu	45	20	10	25	50	35-44	Male	Can read and write	Secondary	Worked for pay (salary, wage, self-employed)	Ilege			No	No	No	No	No	Yes	Civil servant	Yes	25		Yes	Yes	No			Yes	No	Yes	No	Yes	Coconut sweet potatoes vegetables rice beans	14400		16160		0
861598034197054	700	2017-08-18 10:49:32	2017-08-18 11:01:12	2017-08-19 13:16:04	1708151239	uuid:cca01d7c-ade2-4910-a45c-5f9f04117662	126	Yes	111	Yakubu	40	20	7	12	50	35-44	Female	Cannot read and write	None/never attended school	Did not work and didn't looked for a job	Itoke			No	No	No	No	No	Yes	Retailer	Yes	25		Yes	Yes	No			Yes	No	Yes	No	Yes	Plantain cocoyam sweet potatoes vegetables beans	30000		30000		Don't Know
861598034197054	315	2017-08-18 11:47:34	2017-08-18 11:52:50	2017-08-19 13:16:08	1708151239	uuid:d8ec3ec3-11e1-478d-954e-6dfdd9169cff	127	Yes	117	Yakubu	35	10	20	25	45	35-44	Male	Can read and write	Primary	Worked without pay (apprentice, family business, etc…)	Itoke			No	Yes	Yes	No	No	No		Yes	17		Yes	Yes	No			No	No	Yes	No	Yes	Yam plantain vegetables			16000		0
861598034197054	659	2017-08-18 13:10:55	2017-08-18 13:21:54	2017-08-19 13:16:08	1708151239	uuid:f707e08a-2ed5-4264-bed6-eed0f73d7bd4	128	Yes	127	Yakubu	23	13	5	5	53	35-44	Male	Cannot read and write	Higher	Did not work and didn't looked for a job	Ilege			No	No	No	No	No	Yes	Community chief	Yes	20		Yes	Yes	No			Yes	No	Yes	No	Yes	Coconut kolanut vegetables melon orange mango water melon	8320		20000		0
a9f85941d979a989	729	2017-08-22 10:15:36	2017-08-22 10:27:45	2017-08-22 11:45:06	1708151239	uuid:15d40003-4562-4b47-aa16-ae71ae283df5	129	Yes	139	Magbagbeola	30	15	10	20	45	35-44	Male	Cannot read and write	Primary	Worked for pay (salary, wage, self-employed)	Imobido			No	No	No	Yes	Yes	No		Yes	10		Yes	Yes	No			Yes	No	Yes	Yes	Yes	Banana pawpaw yam cocoyam coconut palm kernel cashew	4000		150000	2500	2500
7bdabb0ed70b6ce6	879	2017-08-18 13:31:40	2017-08-18 21:48:54	2017-08-20 10:55:58	1708151239	uuid:5fbb5211-3046-43a1-874e-9cac85a9e1d5	130	Yes	125	Magbagbeola	100	50	50	80	50	35-44	Female	Can read and write	Secondary	Did not work and didn't looked for a job	Ilege			No	Yes	No	No	No	No		Yes	10		Yes	Yes	No			Yes	Yes	Yes	No	Yes	Vegetable, pepper, mango, coconut, tomatoes, cocoyam, banana	200000	500	680000		121500
7bdabb0ed70b6ce6	1138	2017-08-18 11:05:54	2017-08-18 11:24:51	2017-08-20 10:55:57	1708151239	uuid:6a1d11b4-4707-4c9e-8d5e-a811d9374cd0	131	Yes	123	Magbagbeola	70	15	25	25	54	45-54	Male	Can read and write	Primary	Worked for pay (salary, wage, self-employed)	Itoke			No	Yes	No	No	Yes	Yes	Tailor	Yes	130		Yes	Yes	No			Yes	Yes	Yes	Yes	Yes	Vegetable, banana, cashew, tomatoes	1600	800	20000	100000	100000
a9f85941d979a989	2175	2017-08-21 13:25:25	2017-08-22 11:43:12	2017-08-22 11:45:05	1708151239	uuid:7b1680fc-3d31-436e-9858-5b40d3108a5d	132	Yes	137	Magbagbeola	100	25	20	45	70	65+	Male	Can read and write	Secondary	Worked for pay (salary, wage, self-employed)	Imobido			No	Yes	No	No	No	Yes	Contractor	Yes	12		Yes	Yes	No			No	No	Yes	No	Yes	Banana pawpaw coconut cocoyam cashew palm kernel			250000		5000
a9f85941d979a989	1834	2017-08-21 13:04:26	2017-08-22 11:27:10	2017-08-22 11:45:04	1708151239	uuid:81dc29a6-fcae-41ad-968e-b20cb92bf708	133	Yes	136	Magbagbeola	100	25	30	65	70	65+	Male	Can read and write	Secondary	Did not work and didn't looked for a job	Imobido			No	Yes	No	No	No	Yes	Retired	Yes	25		Yes	Yes	No			No	No	Yes	No	Yes	Beans rice pawpaw cocoyam, palm kernel, yam, banana, coconut			25000		10000
7bdabb0ed70b6ce6	604	2017-08-18 10:55:38	2017-08-18 11:05:42	2017-08-20 10:55:57	1708151239	uuid:b475e99b-87ee-4df1-b619-f2d485a7875b	134	Yes	122	Magbagbeola	16	9	6	12	50	35-44	Male	Cannot read and write	None/never attended school	Worked for pay (salary, wage, self-employed)	Itoke			No	No	Yes	No	No	Yes	Labourer	Yes	75		Yes	Yes	No			Yes	Yes	Yes	Yes	Yes	Yam, banana, tomatoes, pepper, vegetable, melon, mango, Kolanut, cashew, coconut	14400	2500	8000	150000	150000
7bdabb0ed70b6ce6	827	2017-08-18 11:27:03	2017-08-18 11:40:49	2017-08-20 10:55:57	1708151239	uuid:c7929c25-413f-4332-9def-a65ed26a67fb	135	Yes	124	Magbagbeola	15	4	2	7	62	45-54	Male	Can read and write	Secondary	Worked for pay (salary, wage, self-employed)	Itoke			No	Yes	No	No	Yes	Yes	Fashion designer	Yes	12		Yes	Yes	No			No	No	Yes	No	No				2500
7bdabb0ed70b6ce6	583	2017-08-18 11:49:02	2017-08-18 11:58:45	2017-08-20 10:55:58	1708151239	uuid:d7f5557c-d0a5-460a-8ade-f067b3c4d0d2	136	Yes	124	Magbagbeola	20	7	2	12	41	25-34	Male	Cannot read and write	Primary	Worked for pay (salary, wage, self-employed)	Itoke			No	No	Yes	No	No	No		Yes	20		Yes	Yes	No			Yes	Yes	Yes	Yes	Yes	Beans, yam, cocoyam, sweet potatoes, mango, cashew, guava, cherry, garden egg etc	1600	1000	10000	50000	50000
7bdabb0ed70b6ce6	1306	2017-08-18 10:33:44	2017-08-18 10:55:30	2017-08-20 10:55:56	1708151239	uuid:fb549848-6917-4447-a1e6-3702ef95e421	137	Yes	121	Magbagbeola	30	10	8	25	38	25-34	Male	Cannot read and write	Secondary	Worked for pay (salary, wage, self-employed)	Itoke			No	Yes	No	No	No	Yes	Security	Yes	50		Yes	Yes	No			Yes	Yes	Yes	Yes	Yes	Vegetable, tomatoes, cocoyam, sweet potatoes, banana, coconut, plam tree, pine Apple, paw paw	24000	15000	100000	130000	130000
a9f85941d979a989	505	2017-08-22 10:31:13	2017-08-22 10:39:38	2017-08-22 11:45:06	1708151239	uuid:007761bf-4b80-4725-9c72-b53ed82b1b62	138	Yes	140	Magbagbeola	65	18	10	35	72	65+	Male	Cannot read and write	None/never attended school	Did not work and didn't looked for a job	Imobido			No	No	No	No	No	Yes	Retired	Yes	15		Yes	Yes	No			Yes	Yes	Yes	No	Yes	Pine apple, cashew, banana, palmkernel, yam, coconut, mango	3200	1000	150000		5000
a9f85941d979a989	562	2017-08-21 13:36:41	2017-08-22 11:28:33	2017-08-22 11:45:05	1708151239	uuid:3a712108-8d51-4dc0-9b43-8f8b0f36009c	139	Yes	138	Magbagbeola	100	47	40	45	55	45-54	Male	Can read and write	Secondary	Worked for pay (salary, wage, self-employed)	Imobido			No	No	No	No	No	Yes	Surveyor	Yes	40		Yes	Yes	No			No	No	Yes	No	Yes	Cashew coconut banana pawpaw cocoyam beans etc			Don't Know		Don't Know
a9f85941d979a989	741	2017-08-22 11:29:03	2017-08-22 11:41:24	2017-08-22 11:45:07	1708151239	uuid:b7be20f4-cd9e-4ff5-9ce4-e7fba007df5d	140	Yes	135	Magbagbeola	75	35	15	35	58	45-54	Female	Cannot read and write	Primary	Worked for pay (salary, wage, self-employed)	Imobido			No	No	No	Yes	No	No		Yes	14		Yes	Yes	No			Yes	No	Yes	Yes	Yes	Beans rice, tomatoes, pepper, vegetables, yam, cocoyam, coconut, palm kernel	2000		80000	3000	3000
[truncated: 133 more columns]
